1     **CPSF3 inhibition blocks pancreatic cancer cell proliferation through**  
2                     **disruption of core histone processing**

3  
4  
5  
6  
7     Abdulrahman. A. Alahmari<sup>1,2</sup>, Aditi H. Chaubey<sup>1</sup>, Arwen A. Tisdale<sup>1</sup>, Carla D. Schwarz<sup>1</sup>,  
8     Abigail C. Cornwell<sup>1</sup>, Kathryn E. Maraszek<sup>1</sup>, Emily J. Paterson<sup>1</sup>, Minsuh Kim<sup>1</sup>, Swati  
9     Venkat<sup>1</sup>, Eduardo Cortes Gomez<sup>3</sup>, Jianmin Wang<sup>3</sup>, Katerina V. Gurova<sup>4</sup>, and Michael E.  
10    Feigin<sup>1</sup>

11  
12  
13  
14    <sup>1</sup>Department of Pharmacology and Therapeutics, Roswell Park Comprehensive Cancer Center, Buffalo,  
15    NY 14203

16    <sup>2</sup>Department of Medical Laboratory Sciences, Prince Sattam Bin Abdulaziz University, Alkharj 16278,  
17    Saudi Arabia

18    <sup>3</sup>Department of Biostatistics and Bioinformatics, Roswell Park Comprehensive Cancer Center, Buffalo,  
19    NY 14203

20    <sup>4</sup>Department of Cell Stress Biology, Roswell Park Comprehensive Cancer Center, Buffalo, NY 14203

21  
22    Correspondence may be addressed to: MEF ([michael.feigin@roswellpark.org](mailto:michael.feigin@roswellpark.org)), Twitter:  
23    @TheFeiginLab

24  
25  
26    The authors declare no potential conflicts of interest.

27  
28    Running title: Targeting CPSF3 in pancreatic ductal adenocarcinoma

29 **Abstract**

30 Pancreatic ductal adenocarcinoma (PDAC) is a lethal disease with limited effective treatment  
31 options. This potentiates the importance of uncovering novel drug targets. We have discovered  
32 global dysregulation of the gene regulatory process alternative polyadenylation (APA) in PDAC.  
33 APA is a pre-mRNA processing mechanism that generates mRNAs with distinct 3' ends,  
34 impacting gene expression and protein function. We revealed that APA dysregulation in PDAC  
35 drives oncogenic signatures and predicts poor patient outcome. As APA directs widespread gene  
36 expression dysregulation across the PDAC patient population, we hypothesized that inhibition of  
37 APA has therapeutic potential. APA is controlled by a complex of proteins, including cleavage and  
38 polyadenylation specificity factor 3 (CPSF3). CPSF3 is the endonuclease catalyzing mRNA  
39 cleavage, and a potentially druggable target. We now find that *CPSF3* is highly expressed and  
40 associated with poor prognosis in PDAC patients. CPSF3 knockdown decreases PDAC  
41 proliferation and clonogenicity *in vitro* and tumor growth *in vivo*. We demonstrate that *CPSF3*  
42 knockdown induces widespread APA alterations of oncogenes and tumor suppressors, and  
43 determine the contribution of one of these events to CPSF3-induced cell proliferation phenotype.  
44 Furthermore, we find that PDAC, but not non-transformed pancreatic cells, are sensitive to the  
45 CPSF3 small molecule inhibitor JTE-607. Mechanistically, JTE-607 impairs replication-dependent  
46 histone processing, disrupting nucleosome assembly and destabilizing chromatin structure.  
47 Finally, we determine that JTE-607 attenuates cell proliferation by arresting cells in early S-phase  
48 of the cell cycle. Altogether, we identify CPSF3 as a druggable target in PDAC and reveal novel  
49 mechanisms by which CPSF3 controls cancer cell growth.

50

51 **Significance:** This work identifies CPSF3 as a potential drug target in pancreatic ductal  
52 adenocarcinoma and reveals new mechanisms by which CPSF3 inhibition attenuates PDAC cell  
53 proliferation through modulating alternative polyadenylation and histone processing.

## 54 Introduction

55 Pancreatic ductal adenocarcinoma (PDAC) is the third leading cause of cancer deaths with a five-  
56 year survival rate of 11%, due in part to the lack of effective treatment options (1). PDAC is  
57 primarily driven by mutations in the oncogene *KRAS* and several tumor suppressors, including  
58 *TP53*, *CDKN2A* and *SMAD4* (2). However, as clinically effective modulators of activity of these  
59 proteins are not currently available, identification of novel targets amenable to small molecule  
60 inhibition is a critical undertaking. Recently, large-scale RNA sequencing efforts of PDAC tumors  
61 have revealed widespread dysregulation of oncogenic gene expression, allowing the  
62 characterization of several PDAC subtypes and phenotypic states (3–6). These gene expression  
63 changes are critical for driving tumor phenotypes, including metastatic progression (7–11). While  
64 these gene expression changes have been extensively catalogued, the mechanisms underlying  
65 this transcriptional heterogeneity remain largely unknown (12). We propose that targeting these  
66 drivers of dysregulated gene expression represents an opportunity to reverse widespread  
67 oncogenic activity in transformed cells.

68  
69 One such gene regulatory process that has been implicated in cancer is alternative  
70 polyadenylation, or APA (13–15). APA is a co-transcriptional mRNA processing mechanism that  
71 generates distinct transcript isoforms with different 3' untranslated region (UTR) lengths,  
72 ultimately affecting mRNA stability, localization and translation (13). Recently, we identified  
73 widespread APA alterations in PDAC patients that are associated with functional changes in both  
74 gene and protein expression of growth-promoting genes (16). We revealed APA as a new  
75 mechanism that regulates PDAC gene expression, identified patterns of APA associated with  
76 poor patient outcome, and uncovered novel APA-regulated therapeutic targets. As APA is widely  
77 dysregulated across the PDAC patient population, and drives known pro-tumorigenic pathways,  
78 we propose that APA inhibition represents a promising therapeutic approach.

79  
80 Cleavage and polyadenylation specificity factor 3 (CPSF3) is the endonuclease responsible for  
81 mRNA cleavage and is part of two distinct RNA processing complexes (17). One is the APA  
82 complex where CPSF3 cooperates with other APA factors to cleave the mRNA prior to the  
83 addition of the poly(A) tail. The second is the histone cleavage complex (HCC) where pre-mRNAs  
84 of replication-dependent core histones are cleaved by CPSF3 but not polyadenylated. Recently,  
85 CPSF3 was identified as the target of the small molecule JTE-607 (18,19). JTE-607 is hydrolyzed  
86 into an active compound that directly interacts with the CPSF3 interfacial cavity (19). This  
87 interaction inhibits CPSF3 catalytic activity leading to accumulation of unprocessed newly

88 synthesized pre-mRNAs. JTE-607 induces apoptosis of human acute myeloid leukemia (AML)  
89 and Ewing sarcoma cells *in vitro* and prolongs survival of tumor-bearing mice in xenograft models  
90 *in vivo* (20,21). Notably, administration of JTE-607 in healthy volunteers demonstrated the safety  
91 of this compound in humans, with no severe adverse events reported (22). However, the role of  
92 CPSF3 and the effect of JTE-607 in epithelial cancers remains largely unknown.

93  
94 Here, we show that knockdown and/or inhibition of CPSF3 attenuates PDAC cell proliferation *in*  
95 *vitro* and *in vivo*. We find that CPSF3 is highly expressed in PDAC patients and is a predictor of  
96 poor outcome. We conduct the first global analysis of CPSF3 loss in cancer, uncovering APA  
97 events correlating with expression alterations in tumor suppressors and oncogenes. Additionally,  
98 we find that small molecule inhibition of CPSF3 by JTE-607 selectively attenuates proliferation of  
99 PDAC cells but not non-transformed cells. Finally, we uncover a new mechanism by which JTE-  
100 607 attenuates cell proliferation, through disruption of replication-dependent histone mRNA  
101 processing, thus altering chromatin stability and dysregulating the cell cycle.

102  
103 To our knowledge, our study is the first to pharmacologically target CPSF3 activity in epithelial  
104 cancers in general, and in PDAC specifically. We reveal that CPSF3 disruption blocks cell  
105 proliferation through multiple mechanisms, including APA-mediated gene expression alterations  
106 and disruption of proliferation-dependent histone mRNA processing. Furthermore, we provide the  
107 first connection between CPSF3 inhibition and chromatin stability. Overall, our findings uncover  
108 new functions of CPSF3 in cancer and nominate CPSF3 as a novel therapeutic target in PDAC.

109

## 110 **Materials and Methods**

### 111 **Cell lines and *in vitro* culture**

112 HEK293T, MiaPaCa2 and Panc1 were purchased from ATCC. Suit2 cells were obtained from Dr.  
113 David Tuveson (Cold Spring Harbor Laboratory). Human immortalized C7 CAFs and PancPat  
114 CAFs cells were obtained from Dr. Edna Cukierman (Fox Chase Cancer Center). Cells were  
115 cultured in DMEM (Corning, DMEM [+] 4.5 g/L glucose, L-glutamine, sodium pyruvate)  
116 supplemented with 10% fetal bovine serum (FBS) and 1% penicillin-streptomycin. Non-  
117 transformed pancreatic cell lines HPNE and HPDE were obtained from Dr. Ethan Abel (Roswell  
118 Park Comprehensive Cancer Center). HPNE cells were cultured in 75% DMEM+25% Medium M3  
119 Base supplemented with 2mM L-glut, 1.5g/L sodium bicarbonate, 5% FBS, 10ng/mL hEGF and  
120 5.5mM D-glucose. HPDE cells were cultured in Keratinocyte SFM (serum-free media)  
121 supplemented with 25mg BPE, 2.5µg EGF, 1X anti-anti and 50µg/mL Gentamicin. HeLa-TI cells

122 were obtained from Dr. Katerina Gurova (Roswell Park Comprehensive Cancer Center) and were  
123 cultured in phenol red-free FluoroBrite DMEM complete Media (ThermoFisher). All cell lines were  
124 cultured at 37°C with 5% CO<sub>2</sub> and tested negative for Mycoplasma.

125

#### 126 **Generation of stable CPSF3 knockdown cells**

127 Vectors expressing short-hairpin RNA (shRNA) targeting CPSF3 (sh1 Target sequence:  
128 GCTGAGATTGATCTCCTATTA; Clone ID: NM\_016207.2-219s1c1, sh2 Target sequence:  
129 CCAGTGAATTTATTCGTGCTT; Clone ID: NM\_016207.2-1240s1c1) were purchased from  
130 Sigma-Aldrich. Cells were infected with lentivirus harboring pLKO.1-shNTC (non-targeting  
131 control) and pLKO.1-shCPSF3. Polybrene was used to increase the efficacy of infection. After 72  
132 hours, cells were selected with 2.5µg/ml puromycin. Knockdown was confirmed by qPCR and  
133 immunoblotting.

134

#### 135 **RNA isolation and quantitative PCR**

136 Cells were lysed with TRIzol reagent (Thermofisher Scientific; Cat # 15596026). RNA was isolated  
137 using Direct-zol RNA Miniprep Kit (Zymo Research; Cat # R2050). cDNA was synthesized using  
138 iScript cDNA Synthesis Kit (Bio-Rad; Cat# 1708891). qPCR was conducted with SYBR Green  
139 PCR primers (CPSF3; Unique Assay ID: qHsaCID0007422, ACTB; Unique Assay ID  
140 qHsaCED0036269, HIST1H3B; Unique Assay ID: qHsaCED0007746, HIST1H2BC; Unique  
141 Assay ID: qHsaCED0007746, FHL1; Unique Assay ID: qHsaCED0038537) mixed with iTaq  
142 Universal SYBR Green Supermix (Bio-Rad; Cat# 1725120) and run on CFX connect systems  
143 (Bio-Rad). Data were analyzed in Microsoft Excel and graphed using GraphPad Prism (v 9.3.0).

144

#### 145 **RNA-sequencing and APA analysis**

146 Cells were trypsinized, washed with 1X PBS and sent frozen (-80°C) for RNA sequencing (RNA-  
147 seq). 500ng total RNA was used to prepare the sequencing libraries using KAPA RNA HyperPrep  
148 Kit with RiboErase (HMR) (Roche Sequencing Solutions) following manufacturer's protocol.  
149 Briefly, ribosomal RNA (rRNA) was depleted from total RNA and DNase-digested to remove  
150 gDNA contamination. RNA was purified, fragmented and first strand cDNA was synthesized using  
151 random primers. cDNA:RNA hybrids were converted into double-stranded cDNA (dscDNA) using  
152 dUTP incorporation. Adapters were added to the 3' ends, ligated to library insert fragments and  
153 the library amplified in a strand-specific manner. Data were analyzed by the Bioinformatics Shared  
154 Resource (Roswell Park Comprehensive Cancer Center). APA analysis was done using Dynamic

155 Analysis of Alternative Polyadenylation from RNA-seq (DaPars) algorithm (23). Exact steps  
156 followed for this analysis were previously described in (16).

157

### 158 **Immunoblotting**

159 Samples were lysed using RIPA lysis buffer (50mM Tris. HCl pH 7.5, 150mM NaCl, 5mM EDTA  
160 pH 8, 1% Triton X-100, 0.5% NP-40) in the presence of 10ug/ml protease inhibitors (Aprotinin,  
161 Leupeptin, PMSF), boiled at 95°C for 5min and resolved by SDS-PAGE. Proteins were transferred  
162 to nitrocellulose membranes (0.2  $\mu$ m, Bio-Rad, Cat. # 1620112) at a constant voltage of 100V for  
163 70 minutes at 4°C using Mini Trans-Blot® Cell (Bio-Rad). Membranes were blocked in TBST (Tris-  
164 buffered saline (TBS) with 0.1% v/v TWEEN-20; Sigma Aldrich) and 5% w/v nonfat dry milk  
165 (Blotting-Grade Blocker #1706404, Bio-Rad). Primary antibodies were diluted in 3% BSA in TBST  
166 and incubated overnight at 4°C (mouse monoclonal CPSF3 antibody, Abcepta, AT1610a; rabbit  
167 polyclonal Histone H3 antibody, Cell Signaling Technology, 9715S; rabbit polyclonal Histone H2B  
168 antibody, Cell Signaling Technology, 8135S; mouse monoclonal GAPDH antibody, Proteintech,  
169 60004-1-Ig; rabbit polyclonal FHL1 antibody, Proteintech, 10991-1-AP). Membranes were  
170 incubated with horseradish peroxidase-conjugated secondary antibodies at 1:2,000 dilution  
171 (Donkey anti-rabbit; Fisher Scientific; Catalog number: 45-000-682, or Goat anti-mouse; Sigma-  
172 Aldrich; Catalog number: A4416) for 1 hour at room temperature. Pierce ECL Western Blotting  
173 Substrate (Thermo Scientific, Catalog number: 32106) and Supersignal West Femto Maximum  
174 Sensitivity substrate (Thermo Scientific, Catalog number: 34094) were used for chemiluminescent  
175 detection. Signals were visualized and imaged using the ChemiDoc XRS+ System and Image  
176 Lab Software (Bio-Rad).

177

### 178 **Proliferation and clonogenicity assays**

179 For proliferation experiments, cells were seeded at a density of 250 cells/well (MiaPaCa2 and  
180 Panc1 cells) or 1000 cells/well (HPNE cells) into a white 96-well plate in triplicate. Cell proliferation  
181 was measured using CellTiter-Glo Luminescent Cell Viability Assay Kit (Promega) at days 0, 2, 4  
182 and 6. For clonogenicity assays, cells were seeded at a density of 500 cells/well into a 6-well plate  
183 in triplicate. After 11 days, cells were fixed with 4% formalin, stained with 0.2% Crystal Violet and  
184 images were obtained for analysis. Colony area was measured using ImageJ software. Data were  
185 normalized to control data points.

186

### 187 **Cell cycle analysis**

188 Cells were trypsinized and resuspended in 1X PBS, then fixed with ice-cold 70% ethanol for 1  
189 hour at -20°C. Cells were then washed with cold 1X PBS and incubated with RNaseA (200µg/ml)  
190 at 37°C for 1 hour. Propidium iodide (40µg/ml) was then added, incubated for 1 hour in the dark  
191 and analyzed by FACS at 488nm. Data were analyzed by FCS express software (v7.06.0015).

192

### 193 **BrdU incorporation assay**

194 Cells were cultured under optimum conditions and incubated with 50µM BrdU (5-Bromo-2'-  
195 deoxyuridine; Sigma-Aldrich; B5002) for 4 hours. Cells were then rinsed with 1X PBS, trypsinized,  
196 permeabilized in 70% ice cold ethanol with gentle vortexing and stored at -20°C overnight. Next,  
197 cells were pelleted and DNA was hydrolyzed by incubating with 500µl of 2N HCl, 0.5% Triton X-  
198 100 in 1X PBS, incubated for 30 minutes at room temperature and then neutralized by adding  
199 1.5ml of 0.1 M sodium tetraborate (pH 8.5) for 2 minutes. Cells were then pelleted, washed once  
200 with 1% BSA in 1X PBS and resuspended in 50µl 0.5% Tween 20, 1% BSA in 1X PBS. Next, 10<sup>6</sup>  
201 cells were incubated with 1µg Anti-BrdU-FITC (FITC anti-BrdU Antibody; BioLegend;  
202 Cat#364104) for 1 hour at room temperature. Cell pellets were washed once with 150µl 1% BSA  
203 in 1X PBS, resuspended in 500µL 1X PBS with RNaseA (200 µg/ml) and PI (40 µg/ml) and  
204 incubated at room temperature for 30 minutes in the dark. Cells were analyzed by flow cytometry  
205 immediately and a compensation step was performed. Data were analyzed by FCS Express  
206 software (v7.06.0015).

207

### 208 **3' RACE**

209 3' RACE was performed as previously described (16). Briefly, first strand cDNA was synthesized  
210 from the poly(A) tail using an adapter primer (5'-  
211 GACTCGAGTCGACATCGATTTTTTTTTTTTTTTTTTTT-3'). Gene specific PCR amplification was  
212 then performed using a gene specific primer spanning the stop codon (FHL1: 5'-  
213 TCCACTGCAAAAATGCTCCGTGA-3') and an adapter-targeting primer (5'-  
214 GACTCGAGTCGACATCG-3'). The PCR products were run on a 1.2% agarose gel and visualized  
215 and imaged using the ChemiDoc XRS+ System and Image Lab Software (Bio-Rad).

216

### 217 **Xenograft experiments**

218 Animal experiments were approved by the Roswell Park Institutional Animal Care and Use  
219 Committee. MiaPaCa2 cells infected with shNTC and sh1 CPSF3 constructs were trypsinized,  
220 washed with 1X PBS and counted. 5x10<sup>5</sup> cells were resuspended in 50µl of 1X PBS/Matrigel  
221 (Corning Life Sciences, 356231) in a 1:1 ratio and injected subcutaneously into the flanks of 8-

222 week old NOD/SCID/IL2R $\gamma^{-/-}$  (NSG) mice. When palpable, tumor volume was determined by  
223 caliper measurements obtained in 2 dimensions and calculated as width<sup>2</sup> x length/2 twice a  
224 week. Mice were euthanized when the first tumor reached 1400 mm<sup>3</sup>, tumors were dissected,  
225 and tumor volumes were measured.

226

### 227 **JTE-607 studies**

228 For dose-response measurements, cells were seeded at a density of 1000 cells per well in a 96-  
229 well white plate. The next day, JTE-607 was titrated over a range of concentrations using the  
230 Tecan D300e Digital Dispenser and cell viability was measured 72 hours post drug titration using  
231 a CellTiter-Glo Luminescent Cell Viability Assay Kit (Promega). For cell proliferation experiments,  
232 cells were seeded at a density of 250 cells per well in a 96-well white plate. DMSO control or JTE-  
233 607 was dispensed at varying concentrations and proliferation was measured using CellTiter-Glo  
234 Assay at days 0, 2, 4 and 6. For clonogenicity experiments, cells were seeded at a concentration  
235 of 500 cells per well and treated with different concentrations of JTE-607. Cells were allowed to  
236 grow over a period of 11-14 days after which they were fixed in 4% formalin, stained with 0.2%  
237 Crystal Violet and images were obtained for analysis. Colony area was measured using ImageJ  
238 software. Data were normalized to DMSO control data points.

239

### 240 **Micrococcal digestion**

241 Micrococcal Nuclease (MNase) was performed as previously described (24). Briefly, cells were  
242 trypsinized, washed with 1X RSB buffer (10mM Tris HCL, pH7.6; 15mM NaCl; 1.5mM MgCl<sub>2</sub>)  
243 and pelleted at 1000rpm for 4 minutes at room temperature. Cell pellets were resuspended in 1X  
244 RSB buffer with 1% TritonX-100, homogenized with a loose pestle (5 strokes) and centrifuged for  
245 5 minutes at 2000rpm at 4°C. Pellets were washed two times with 1ml of buffer A (10mM Tris  
246 HCL, pH7.6; 15mM NaCl; 60mM KCl; 0.34M Sucrose; 0.1% B-mercaptoethanol; 0.15mM  
247 Spermine; 0.5 mM Spermidine; 0.25mM PMSF) and nuclei were pelleted at 160g for 10 minutes  
248 at 4°C. Nuclei were resuspended in 1.5ml of buffer A supplemented with 1mM of CaCl<sub>2</sub>. Nuclear  
249 suspensions (500 $\mu$ l) were digested with 200U/ml Micrococcal nuclease (NEB, cat#MO247S) at  
250 37°C at different time points. Digestion was inactivated by 15mM EDTA. 10%SDS and 1M NaCl  
251 were added to extract genomic DNA. DNA was run and visualized using TapeStation 4200 system  
252 (Genomic Shared Recourse, Roswell Park Comprehensive Cancer Center).

253

### 254 **Statistical analyses**



255 Experimental findings were obtained from three independent experiments unless stated  
256 otherwise. Statistics were performed in GraphPad Prism 9. In general,  $P < 0.05$  was considered  
257 statistically significant. All statistical methods and P-values are provided in the figure legends.  
258 Asterisks in graphs denote statistically significant differences as described in figure legends.

259

260 **Code availability**

261 The code used to analyze the data is available at ([https://github.com/feiginlab/CPSF3\\_PDAC](https://github.com/feiginlab/CPSF3_PDAC)).

262

263

## 264 **Results**

### 265 ***CPSF3* is upregulated in human PDAC and predicts poor patient outcome**

266 To determine the clinical significance of *CPSF3* expression in PDAC, we first analyzed gene  
267 expression data from the Clinical Proteomic Tumor Analysis Consortium (CPTAC) (25). *CPSF3*  
268 expression was significantly higher in PDAC tumors (n=135), as compared with non-tumor  
269 adjacent tissues (n=18) and normal pancreata (n=7) (Fig. 1A). Consistent with this finding, *CPSF3*  
270 expression was also significantly higher in the Pancreatic Adenocarcinoma (PAAD) dataset from  
271 The Cancer Genome Atlas (TCGA) (n=147) as compared to normal pancreata (n=165) from The  
272 Genotype-Tissue Expression (GTEx) project (Fig. 1B). Next, we sought to assess the relationship  
273 between *CPSF3* expression and PDAC patient outcome. Patients with high *CPSF3* expression  
274 had significantly worse overall survival than patients with low *CPSF3* expression (p=0.00164,  
275 hazard ratio 5.047 (1.842-13.827)). Specifically, patients in the top quartile of *CPSF3* expression  
276 had a median survival of 14.2 months, while those in the bottom quartile of *CPSF3* expression  
277 had a median survival of 33.5 months (Fig. 1C). We then sought to assess *CPSF3* expression  
278 status in our cell line models. In agreement with the clinical data, we found that *CPSF3* is  
279 upregulated in PDAC cell lines (MiaPaCa2, Suit2, Panc1) as compared to non-transformed  
280 pancreatic epithelial cells (HPNE, HPDE) by RT-qPCR and western blot (WB) (Fig 1D,E).  
281 Therefore, *CPSF3* is highly expressed in PDAC, high expression correlates with poor patient  
282 outcome, and our cell models are appropriate for mechanistic studies.

283

### 284 ***CPSF3* is required for PDAC cell proliferation and tumor growth**

285 To define the functional role of *CPSF3* in PDAC we first took a genetic approach and generated  
286 stable *CPSF3* knockdown MiaPaCa2 and Panc1 cells. We used two different short hairpin RNAs  
287 (sh1 and sh2) targeting *CPSF3*, and a non-targeting control (shNTC). Successful knockdown of  
288 *CPSF3* was confirmed at the RNA and protein level by RT-qPCR and WB, respectively, with sh1  
289 cells having the highest level of knockdown in both cell lines (Fig. 2A,B). We then examined the  
290 effect of *CPSF3* knockdown on cell proliferation and colony formation capability. *CPSF3*  
291 knockdown significantly attenuated proliferation as compared with shNTC controls in both  
292 MiaPaCa2 and Panc1 cells (Fig. 2C). *CPSF3* knockdown also significantly decreased colony  
293 formation (Fig. 2D,E). In both the proliferation and colony formation assays, and in both PDAC  
294 cell lines, sh1 *CPSF3* had the strongest phenotype, consistent with higher levels of *CPSF3*  
295 knockdown.

296

297 Next, we sought to determine the requirement for CPSF3 in PDAC tumor growth *in vivo*. We  
298 implanted MiaPaCa2 cells (either shNTC or sh1 CPSF3,  $5 \times 10^5$  per mouse) subcutaneously into  
299 the flanks of NOD/SCID/IL2R $\gamma^{-/-}$  (NSG) mice. *CPSF3* knockdown tumors grew significantly slower,  
300 and weighed significantly less at endpoint, than shNTC tumors (Fig. 2F-H). No changes in tumor  
301 histopathology were noted by Hematoxylin and Eosin (H&E) staining (Fig. 2I).  
302 Immunohistochemical (IHC) analysis revealed that CPSF3 knockdown was maintained *in vivo*  
303 (Fig. 2J). Finally, IHC for Ki67 revealed a significant decrease in proliferation in *CPSF3*  
304 knockdown tumors as compared with shNTC controls (Fig. 2K). Overall, these data support the  
305 requirement for CPSF3 in PDAC cell proliferation and tumor growth.

306

### 307 **CPSF3 knockdown dysregulates global gene expression in PDAC cells**

308 CPSF3 is an integral component of the polyadenylation complex; therefore, we hypothesized that  
309 *CPSF3* knockdown would dysregulate APA, leading to global changes in mRNA expression. To  
310 test this hypothesis, we subjected sh1 CPSF3 and shNTC Panc1 cells to RNA-sequencing (RNA-  
311 seq). Differential expression analysis revealed 376 genes significantly upregulated and 98 genes  
312 significantly downregulated (FDR<0.05; fold change >1.5) upon *CPSF3* knockdown. To uncover  
313 significantly altered changes in 3'-UTR length upon *CPSF3* knockdown, we applied the DaPars  
314 algorithm (23). DaPars identifies APA changes from standard RNA-seq data by generating a  
315 Percentage Distal Usage Index (PDUI) score for each gene based on the relative abundances of  
316 3'-UTR long and short forms. A negative PDUI indicates a shortening event, while a positive PDUI  
317 indicates 3'-UTR lengthening. In accordance with our hypothesis, loss of *CPSF3* resulted in global  
318 APA dysregulation, with 402 genes having significantly shorter 3'-UTRs, and 292 genes having  
319 significantly longer 3'-UTRs in *CPSF3* knockdown cells ( $-0.1 > \text{PDUI} > 0.1$ ;  $P < 0.05$ ) (Fig. 3A). APA-  
320 mediated alterations in 3'-UTR length impact mRNA stability and thus, gene expression (13,26–  
321 28). To determine which CPSF3-mediated APA events might be driving individual changes in  
322 gene expression, we looked for genes that were significantly altered in both the DaPars and gene  
323 expression analyses (Fig. 3B). Intriguingly, this list included multiple downregulated oncogenes,  
324 including SMAD Family Member 6 (*SMAD6*) and Mitogen-Activated Protein Kinase Kinase 6  
325 (*MAP2K6*), and upregulated tumor suppressors, including Four And A Half LIM Domains 1 (*FHL1*)  
326 and CKLF-Like MARVEL Transmembrane Domain Containing 3 (*CMTM3*). Therefore, these data  
327 support a role for *CPSF3* in controlling cell proliferation via APA-mediated dysregulation of a suite  
328 of cancer-associated genes.

329

330 We next sought to determine if any of the APA-regulated oncogenes or tumor suppressors were  
331 directly responsible for *CPSF3* knockdown-mediated attenuation of cell proliferation. We focused  
332 on *FHL1*, as it has been reported to possess tumor suppressor activity in non-PDAC cancers (29–  
333 32), but has no known roles in PDAC biology. FHL1 interacts with transcription factors and  
334 signaling proteins, thus modulating gene transcription and signaling pathways (29,33). FHL1  
335 suppresses tumor growth through several mechanisms, including interaction with tumor-  
336 regulating estrogen receptors and SMAD family proteins, and reduction of PI3K/AKT signaling  
337 (29,34,35). The *FHL1* 3'-UTR was significantly lengthened ( $P=0.029$ ), and *FHL1* gene expression  
338 was significantly enriched, in *CPSF3* knockdown cells, as compared with shNTC controls (Fig.  
339 3B,C). *FHL1* was also significantly overexpressed in *CPSF3* knockdown MiaPaCa2 cells, as  
340 compared with shNTC controls (Fig. 3D). We validated the shift in APA patterns of *FHL1* by 3'  
341 RACE (rapid amplification of 3' ends), revealing an increase in the long 3'-UTR form of *FHL1* in  
342 *CPSF3* knockdown cells, and a concomitant decrease in the abundance of the short 3'-UTR form  
343 (Fig. 3E). As APA can impact mRNA stability and translation, we determined FHL1 protein  
344 expression in shNTC and *CPSF3* knockdown cells by WB (Fig. 3F). We found that FHL1 protein  
345 levels were much higher in *CPSF3* knockdown cells. We then asked whether the *CPSF3*-  
346 mediated upregulation of FHL1 was responsible for the effect of *CPSF3* knockdown on PDAC cell  
347 growth. We transiently knocked down *FHL1* using siRNA in both shNTC and *CPSF3* knockdown  
348 cells and assessed the effect on proliferation. Knockdown of *FHL1* was greater than 90% effective  
349 (Fig. 3G). Knockdown of *FHL1* in shNTC cells had no effect on cell viability over the 7-day time  
350 course of the experiment (Fig. 3H). However, knockdown of *FHL1* significantly rescued the  
351 *CPSF3* knockdown-induced proliferation phenotype. Therefore, *CPSF3* knockdown reduces  
352 PDAC cell viability at least in part through upregulation of *FHL1*. Finally, we sought to determine  
353 if there was a correlation between *CPSF3* and *FHL1* gene expression levels in PDAC patients.  
354 We observed a significant negative correlation ( $R=-0.36$ ,  $P<0.0001$ ) between *CPSF3* and *FHL1*  
355 levels within the CPTAC database (Fig. 3I), supporting our conclusion that *FHL1* levels are  
356 mediated by *CPSF3* expression in PDAC.

357

### 358 **PDAC cells are sensitive to chemical inhibition of CPSF3**

359 *CPSF3* was recently identified as the target for the small molecule JTE-607. JTE-607 is a prodrug  
360 that, when metabolized by the ester hydrolyzing enzyme carboxylesterase 1 (CES1), binds to  
361 *CPSF3* and inhibits its catalytic activity, impairing the processing of newly synthesized mRNAs  
362 (19). As genetic depletion of *CPSF3* attenuated PDAC cell proliferation (Fig. 2), we hypothesized  
363 that pharmacologic inhibition of *CPSF3* with JTE-607 could represent a novel therapeutic

364 approach in PDAC. We therefore examined the sensitivity of multiple human pancreatic cell lines,  
365 both non-transformed and PDAC, to JTE-607 in a 72-hour dose-response cell viability assay.  
366 Non-transformed pancreatic epithelial cells (HPNE, IC<sub>50</sub>=130.4μM; HPDE, IC<sub>50</sub>=60.11μM) and  
367 human cancer associated fibroblast cell lines (C7 CAF, IC<sub>50</sub>=70.04μM; PancPat CAFs,  
368 IC<sub>50</sub>=114.2 μM) were not sensitive to JTE-607 (Fig. 4A-C). In contrast, human PDAC cell lines  
369 displayed a range of sensitivities to JTE-607, with Panc1 cells being the most sensitive  
370 (IC<sub>50</sub>=2.163μM) (Fig. 4A,C). Next, we determined the effect of JTE-607 on cell proliferation by  
371 treating cells with increasing concentrations of JTE-607 and assessing cell viability in a time-  
372 dependent fashion (Fig. 4D,E). JTE-607 had no effect on proliferation in non-transformed HPNE  
373 cells (Fig. 4D). However, proliferation of MiaPaCa2 and Panc1 PDAC cells was significantly  
374 attenuated by JTE-607, in a dose-dependent manner (Fig. 4E). Finally, we tested the effect of  
375 JTE-607 on colony formation in PDAC cell lines. JTE-607 significantly decreased colony formation  
376 in all PDAC cell lines tested (Fig. 4F,G). Therefore, JTE-607 selectively attenuates proliferation  
377 of PDAC cells over non-transformed pancreatic cells.

378

### 379 **JTE-607 inhibits expression of replication-dependent histones**

380 To determine the gene regulatory alterations underlying the ability of JTE-607 to attenuate PDAC  
381 cell proliferation, we performed RNA-seq on Panc1 cells treated with DMSO or JTE-607 for 24  
382 hours. Differential gene expression and alterations in 3'-UTR length were analyzed as described  
383 above. Differential expression analysis revealed 1270 genes significantly upregulated and 646  
384 genes significantly downregulated (FDR<0.05; fold change >1.5) upon JTE-607 treatment. We  
385 predicted that inhibition of CPSF3 would result in a global shift towards lengthened 3'-UTRs. In  
386 accordance with our hypothesis, JTE-607 resulted in global APA dysregulation, with 1242 genes  
387 having significantly longer 3'-UTRs, and 429 genes having significantly shorter 3'-UTRs in JTE-  
388 607 treated cells (-0.1>PDUI>0.1; P<0.05) (Fig. 5A). To determine which JTE-607-mediated APA  
389 events might be driving individual changes in gene expression, we looked for genes that were  
390 significantly altered in both 3'-UTR length and gene expression (Fig. 5B). This revealed multiple  
391 downregulated oncogenes, including N-Acetyltransferase 10 (*NAT10*) and Casein Kinase 1 Delta  
392 (*CSNK1D*), and upregulated tumor suppressors, including Elongation Factor For RNA  
393 Polymerase II 2 (*ELL2*) and Cyclin Dependent Kinase Inhibitor 1A (*CDKN1A*). Next, we compared  
394 global APA alterations between the *CPSF3* knockdown and JTE-607 treatment conditions. This  
395 analysis revealed an overlap in APA altered genes upon *CPSF3* knockdown and JTE-607  
396 treatment (120 genes altered in both conditions; -0.1>PDUI>0.1; P<0.05), supporting the  
397 contention that JTE-607 suppresses *CPSF3* activity (Fig. 5C). However, many APA events were

398 distinct between the two conditions, suggesting that long term CPSF3 knockdown may be  
399 mechanistically distinct from short term CPSF3 inhibition.

400  
401 Next, we sought to determine how short term JTE-607 treatment attenuates PDAC proliferation.  
402 We were intrigued to find that numerous histone genes were significantly downregulated upon  
403 JTE-607 treatment in Panc1 cells (Fig. 5D). Gene set enrichment analysis (GSEA) demonstrated  
404 a dysregulation in many histone-related pathways, including histone methylation, acetylation and  
405 deacetylation (Fig. 5E). Interestingly, the majority of the differentially expressed histones were  
406 replication-dependent histones, including *HIST1H2AD*, *HIST1H2BJ*, *HIST1H3A* and *HIST1H4E*.  
407 We validated the JTE-607-induced decrease in replication-dependent histones in MiaPaCa2 cells  
408 (Fig 5F). Therefore, JTE-607 treatment decreases the expression of proliferation-dependent  
409 histones.

410  
411 Replication-dependent histone genes are not polyadenylated and undergo pre-mRNA processing  
412 via the histone cleavage complex (HCC) (36). CPSF3 is the endonuclease component of the HCC  
413 (17,37,38); while *CPSF3* knockdown studies have demonstrated a role for CPSF3 in histone  
414 processing, the effect of inhibiting CPSF3 activity on histone mRNA processing has never been  
415 determined. We reasoned that lack of CPSF3-mediated cleavage activity would result in  
416 transcriptional read-through extending beyond the boundaries of the 3'-UTR. Indeed, we found  
417 that replication-dependent histones underwent transcriptional read-through upon JTE-607  
418 treatment (Fig. 6A). Improperly processed mRNAs fail to be exported into the cytoplasm for  
419 translation, leading to decreased protein levels (17,39,40). Therefore, we examined replication-  
420 dependent histone protein levels upon JTE-607 treatment and found that JTE-607 reduced both  
421 H3 and H2B protein levels in a dose- and time-dependent fashion (Fig. 6B). In contrast,  
422 replication-independent histones did not undergo transcriptional read-through upon JTE-607  
423 treatment, and did not decrease in gene expression levels (Fig. 6C,D). Finally, we sought to  
424 determine if there was a correlation between *CPSF3* and histone gene expression levels in PDAC  
425 patients. We calculated the Spearman's correlation for *CPSF3* and 98 histone genes from the  
426 CPTAC database (Spearman =  $-0.15 > R > 0.15$ ,  $P < 0.05$ ) (Fig. 6E-G). In accordance with our  
427 experimental findings, there were significantly more positive correlations (43 genes) between  
428 *CPSF3* and histone gene expression than negative correlations (3 genes) among replication-  
429 dependent histones (Fig. 5F). In contrast, there were few significant correlations between *CPSF3*  
430 and replication-independent histones (only 8 genes), and those significant alterations were

431 equally positive and negative (Fig. 5G). Collectively, these results indicate that JTE-607 inhibits  
432 the function of CPSF3 in both the APA and histone mRNA processing complexes.

433

#### 434 **JTE-607 destabilizes chromatin and blocks cell cycle progression**

435 As replication-dependent histones are required for nucleosome assembly (36,41–43), we  
436 hypothesized that JTE-607 would dysregulate chromatin dynamics. First, we performed a  
437 Micrococcal Nuclease (MNase) assay to assess relative chromatin condensation. In this assay,  
438 protein-free DNA is digested by MNase, producing DNA fragmentation patterns that are indicators  
439 of whether chromatin is in a condensed or relaxed state. The chromatin destabilizing agent  
440 CBL0137 was used as a positive control (44). Panc1 cells treated with JTE-607 or CBL037  
441 displayed rapid and complete chromatin digestion, as compared with DMSO-treated cells (Fig.  
442 7A, quantification in 7B). To assess chromatin destabilization in a living cell, we utilized the HeLa-  
443 TI cell line model that has a silenced GFP reporter within a heterochromatic region of the genome.  
444 Treatment of these cells with chromatin destabilizing agents, including CBL0137, allows  
445 derepression of GFP silencing. Therefore, we monitored GFP expression in HeLa-TI cells upon  
446 JTE-607 treatment by both fluorescence microscopy and flow cytometry. Cells treated with JTE-  
447 607 induced GFP expression to levels comparable with CBL0137 in a dose- and time-dependent  
448 manner (Fig. 7C-E).

449

450 Finally, we sought to determine how JTE-607-mediated depletion of replication-dependent  
451 histones led to defects in cell viability. As replication-dependent histones are required for cell cycle  
452 progression, we assessed the effects of JTE-607 on cell cycle distribution. In non-transformed  
453 HPNE cells, JTE-607 had no impact on cell cycle distribution (Fig. 8A). In contrast, JTE-607  
454 arrested Panc1 and MiaPaCa2 PDAC cells in S-phase of the cell cycle within 24 hours (Fig. 8B).  
455 To more specifically investigate the timing and extent of S-phase arrest, we examined BrdU  
456 incorporation upon JTE-607 treatment in a time-dependent manner (Fig. 8C). We found that JTE-  
457 607 arrests cells in early to mid S-phase of the cell cycle as early as 8 hours (Fig. 8C). Therefore,  
458 JTE-607 destabilizes chromatin and attenuates PDAC cell viability through S-phase cell cycle  
459 arrest.

460

#### 461 **Discussion**

462 Dysregulation of gene expression is a fundamental driver of cancer (45). This dysregulation can  
463 be driven by non-mutational epigenetic reprogramming, a mechanism that is now recognized as  
464 a hallmark of cancer (46). Emerging evidence has implicated dysregulation of one such non-

465 mutational gene regulatory process, APA, in the pathogenesis of cancer (23,47–49). Pan-cancer  
466 analyses have revealed global changes in APA across the cancer landscape, and mechanistic  
467 studies have characterized how these alterations promote oncogenesis (23,50–52). Recently, we  
468 reported the first large-scale, single cancer study of APA and discovered widespread alterations  
469 in 3'-UTR length across the PDAC landscape. Importantly, many of these APA alterations were  
470 associated with expression changes in growth-promoting genes, highlighting the importance of  
471 APA in driving PDAC pathogenesis (16). Therefore, we hypothesized that therapeutically  
472 targeting APA in PDAC would alleviate this global repatterning of 3'-UTR usage, normalizing the  
473 expression of oncogenes and tumor suppressors, and attenuating tumor growth. To directly test  
474 this hypothesis, we focused on CPSF3, an enzymatic component of the APA machinery that  
475 catalyzes the endonucleolytic cleavage of the pre-mRNA. While CPSF3 has known roles in the  
476 regulation of APA and histone mRNA processing, our study defines the first roles of CPSF3  
477 activity in an epithelial cancer, with implications for therapeutic intervention in intractable  
478 pancreatic cancer. We demonstrate that high *CPSF3* expression is a predictor of poor patient  
479 outcome and uncover the requirement for *CPSF3* in PDAC cell proliferation *in vitro* and tumor  
480 growth *in vivo*. We characterize the global APA alterations driven by loss of *CPSF3*, revealing the  
481 dysregulation of numerous tumor suppressors and oncogenes. We then determine the direct  
482 connection between a CPSF3-mediated APA event in the tumor suppressor *FHL1* and PDAC cell  
483 proliferation. Finally, we reveal dysregulation of histone processing downstream of CPSF3  
484 inhibition, regulating cell cycle progression. These results demonstrate the potential for targeting  
485 CPSF3 as a novel therapeutic approach in PDAC.

486

487 Our study has several clinical implications. First, we show that *CPSF3* expression is dysregulated  
488 in PDAC and high expression correlates with poor prognosis. This is consistent with similar  
489 findings across the cancer landscape, where *CPSF3* has been reported to be a predictor of  
490 unfavorable prognosis in lung and liver cancers (53,54). While several studies have  
491 experimentally manipulated various APA factors and determined the phenotypic impacts, little is  
492 known about the function of CPSF3 in disease, particularly cancer. This is noteworthy for several  
493 reasons. First, CPSF3 is the enzymatic component of the APA machinery, and is thus a potentially  
494 druggable target. Second, despite acting in the same complex, knockdown of specific APA factors  
495 can have opposing impacts on APA and cellular phenotypes (50,51,55–58). Therefore,  
496 understanding the role of CPSF3 specifically in PDAC cell proliferation is critical for elucidating its  
497 potential as a novel therapeutic target. Recently, homozygosity in *CPSF3* missense variants was



498 found to cause intellectual disability and embryonic lethality in humans. However, these  
499 phenotypes were completely absent in the heterozygous carriers (59). In cancer cell line models,  
500 *CPSF3* is essential for cell proliferation when knocked out completely by CRISPR; however,  
501 *CPSF3* is not an essential gene upon shRNA-mediated partial knockdown ([www.depmap.org](http://www.depmap.org)).  
502 This suggests that pharmacological targeting of such an essential gene may be biologically  
503 feasible. In support of this hypothesis, we show that knockdown of *CPSF3* blocks PDAC cell  
504 proliferation and tumor growth, and that the efficiency of knockdown is a determinant of  
505 phenotypic strength. Furthermore, *CPSF3* inhibition does not impair cell cycle progression or  
506 proliferation of non-transformed pancreatic epithelial cells, and the *CPSF3* inhibitor JTE-607 is  
507 non-toxic in humans. Therefore, inhibition of *CPSF3* may preferentially target transformed cells.

508

509 Genetic manipulation of APA factors has been shown to alter APA patterns, dysregulate gene  
510 and protein expression and drive cancer phenotypes (50,51,63,64,52,53,55–57,60–62). While  
511 several recent reports have linked *CPSF3* loss to defects in tumor cell growth, no study has  
512 mechanistically connected *CPSF3* to global dysregulation of APA, gene expression and cell  
513 phenotype. We and others have previously shown the direct effect of cancer-associated APA  
514 alterations on gene expression and cancer cell proliferation and tumor growth (16,23,47,48).  
515 Adding to that body of literature, we now demonstrate that *CPSF3* knockdown alters 3'-UTR  
516 length of multiple tumor suppressors and oncogenes, including *FHL1*, *CMTM3*, *SMAD6* and  
517 *MAP2K6*. To understand if these gene expression changes are responsible for driving *CPSF3*  
518 knockdown-mediated phenotypes, we determined the requirement for FHL1 expression in  
519 mediating cell proliferation. *FHL1* possesses tumor suppressing activity in different cancer types  
520 but has not been investigated in the context of PDAC (29–32). We find that silencing of *FHL1*, in  
521 the context of *CPSF3* knockdown, sufficiently rescues the defect in cell proliferation. Therefore,  
522 we uncover a novel mechanism by which *CPSF3* loss attenuates PDAC cell growth. We also  
523 provide the first global view of the contribution of *CPSF3* activity to PDAC gene expression,  
524 revealing widespread control of genes implicated in cell growth. While dysregulation of FHL1 is  
525 at least partially responsible for the *CPSF3* knockdown cell proliferation phenotype, we propose  
526 that *CPSF3* loss dysregulates the expression of a suite of cell growth genes through altering 3'-  
527 UTR length, thereby attenuating PDAC cell growth.

528

529 Recently, two groups independently demonstrated that *CPSF3* is the target of the small molecule  
530 JTE-607 (18,19). JTE-607 was first identified over 20 years ago as a cytokine synthesis inhibitor;

531 however, the direct molecular target remained elusive. Despite the lack of a defined mechanism,  
532 JTE-607 was tested in a Phase I dose-escalation trial in healthy human volunteers, with no serious  
533 adverse effects (22). Therefore, despite inhibiting an essential enzyme responsible for processing  
534 >70% of polyadenylated mRNAs, JTE-607 is not uniformly toxic in humans. This property, coupled  
535 with our data demonstrating JTE-607's anti-proliferative effects on cancer cells, supports the  
536 contention that targeting CPSF3 is a feasible prospect in PDAC. In humans, endotoxin-induced  
537 production of C-reactive protein, IL-10 and IL-1ra was inhibited by JTE-607 (22). In animal  
538 models, JTE-607 inhibited the production of proinflammatory cytokines, prevented endotoxin  
539 shock and attenuated artificially induced lung and heart injury (65–67). JTE-607 has also been  
540 used in models of acute myeloid leukemia (AML) and Ewing sarcoma and showed growth  
541 inhibitory activity both *in vitro* and *in vivo* (xenograft models) (19–21). However, these studies  
542 were limited to leukemia and sarcoma models, with no efficacy shown for epithelial-derived  
543 tumors. Therefore, the potential for CPSF3 as a therapeutic target in adenocarcinoma was an  
544 open question. Now, we show that JTE-607 preferentially blocks proliferation of PDAC cell lines,  
545 sparing non-transformed cell lines, including epithelial cells and fibroblasts. The mechanisms  
546 underlying this difference in sensitivity are currently unknown, but may relate to variability in basal  
547 proliferation rate. Finally, even though JTE-607 was first described as an inhibitor of cytokine  
548 synthesis, our RNA-seq analysis did not show an enrichment of such pathways. One possible  
549 explanation is that JTE-607 action is cell type dependent. Many of the studies assessing cytokine  
550 levels were performed using measurements from blood, and therefore the cell type responsible  
551 for the changes in cytokine secretion is unknown. It is possible that the effect of JTE-607 on  
552 proliferating epithelial cells is distinct from its effect on cells within the circulation, many of which  
553 are non-proliferative when terminally differentiated. The effects of JTE-607 in different cellular  
554 contexts and cell states warrants further investigation.

555

556 A previous report demonstrated that JTE-607 attenuates cell proliferation in AML and Ewing  
557 sarcoma through increasing R-loop formation and downregulating the expression of DNA damage  
558 response genes. R-loops are DNA:RNA hybrids that form as a result of aberrant transcription, a  
559 characteristic of cancers with genetic rearrangements such as AML and Ewing sarcoma (68,69).  
560 Of note, R-loops increase in models with mRNA cleavage and polyadenylation defects (70),  
561 suggesting that sensitivity of AML and Ewing sarcoma to JTE-607 may be a consequence of high  
562 basal levels of R-loops, which eventually accumulate leading to DNA damage and genomic  
563 instability. In our study, gene set enrichment analysis did not reveal changes in DNA damage

564 response pathways upon *CPSF3* knockdown or inhibition in PDAC cells. Therefore, we propose  
565 that *CPSF3* regulates cell proliferation through distinct mechanisms in AML and Ewing sarcoma  
566 relative to PDAC. In PDAC cells, we find that JTE-607 impairs processing of proliferation-  
567 dependent histone mRNAs. This is consistent with the role of *CPSF3* in the HCC (17,38,71–73).  
568 Defects in the HCC have been shown to reduce the availability of replication-dependent histones  
569 (17,40,74,75). However, prior to now, no studies have described the effect of *CPSF3* inhibition on  
570 HCC activity. Depletion of many HCC genes led to an accumulation of histone read-through  
571 transcripts in the nucleus (37,39). Similarly, we find extensive transcript read-through in  
572 proliferation-dependent histone mRNAs, but not proliferation-independent histone mRNAs upon  
573 JTE-607 treatment. Histone read-through transcripts accumulate in the nucleus, thus failing to be  
574 exported into the cytoplasm and translated into protein. In accordance with this model, we find  
575 that JTE-607 depletes core histone protein levels in PDAC cells. Limited histone supplies  
576 destabilize chromatin integrity through disruption of nucleosome assembly (43). We find that JTE-  
577 607 destabilizes chromatin stability, as demonstrated by increased sensitivity to MNase digestion,  
578 and derepression of heterochromatin-mediated gene expression silencing. These findings reveal  
579 a novel mechanism of JTE-607 activity: dysregulation of proliferation-dependent histone mRNA  
580 processing.

581

582 Expression of replication-dependent histones increases ~30-50 fold during DNA synthesis  
583 (76,77). The life cycle of these core histone genes starts late in G1 through mid S phase of the  
584 cell cycle and degradation occurs at late S phase (36,78). Silencing of the HCC core component  
585 *FLASH* induces S phase arrest in HeLa cells (79). We find that JTE-607 arrests cells in the S  
586 phase of the cell cycle, with cells slowly cycling through early-mid S phase but failing to progress  
587 through late S phase. This is consistent with a previous study where depletion of the histone  
588 chaperone ASF1, an important gene for histone deposition during DNA replication, disrupts  
589 progression through mid to late S-phase (80). In addition, knockdown of *CSTF2*, a gene with dual  
590 functions in APA and histone pre-mRNA processing, delays progression through S phase, but its  
591 expression is highly dependent on cell cycle stage (39). The same study showed that *CPSF3*  
592 expression is not cell cycle regulated, suggesting that the histone phenotype we observe is driven  
593 by *CPSF3* loss and not merely a consequence of cell cycle arrest. Our findings strongly suggest  
594 that JTE-607 mediates its growth attenuating phenotype by reducing histone supplies during S  
595 phase, thereby blocking cell cycle progression.

596

597 This newly discovered mechanism of JTE-607 represents a potential window for new combination  
598 therapy. One possibility is that JTE-607-mediated cell cycle arrest may promote synergism with  
599 cell cycle check-point inhibitors. For instance, the chromatin remodeling histone deacetylase  
600 (HDAC) inhibitors have shown synergistic effect when combined with checkpoint kinase 1 (Chk1)  
601 inhibitors in lung cancer models (81). Histone disruption by JTE-607 may also promote synergism  
602 with chromatin modifying drugs. For example, CBL0137 has shown synergistic effect when  
603 combined with HDAC inhibitors by exacerbating chromatin destabilization (44). These discoveries  
604 may improve the efficacy of approved chromatin remodeling agents and suggest a path forward  
605 for use of JTE-607 in the clinic.

606

607 The mechanistic differences underlying the CPSF3 knockdown and inhibition phenotypes raises  
608 several important questions. As CPSF3 is an integral subunit of both the APA and histone  
609 processing complexes, *CPSF3* knockdown may disrupt proper recruitment of other complex  
610 components. This dysregulation of complex formation may alter complex function in different ways  
611 than inhibition of CPSF3 activity, resulting in divergence in APA patterns and gene expression  
612 alterations. Furthermore, the process of generating stable cells for long-term *CPSF3* knockdown  
613 can result in upregulation of compensatory mechanisms, allowing cell growth in the absence of  
614 an essential gene. These mechanisms will not be accounted for upon pharmacological CPSF3  
615 inhibition, again resulting in differences in APA patterns and gene expression alterations.  
616 However, it should be noted that both CPSF3 knockdown and inhibition led to decreased cell  
617 proliferation and global dysregulation of APA, including that of known tumor suppressors and  
618 oncogenes. Therefore, our results support the development of CPSF3 targeting agents, including  
619 those that can specifically degrade CPSF3.

620

621 In conclusion, our study has revealed the role of CPSF3 in pancreatic cancer and uncovered new  
622 mechanisms by which CPSF3 mediates cell proliferation. CPSF3 knockdown or inhibition induces  
623 APA changes that alter the expression of known tumor suppressors and oncogenes. CPSF3  
624 inhibition disrupts the processing of proliferation-dependent histones, destabilizing chromatin  
625 structure and inhibiting cell cycle progression. Our findings reveal novel insight into how CPSF3  
626 inhibition blocks cell proliferation and provides a new therapeutic target in pancreatic cancer.

627

628 **Authors' Disclosures**

629 The authors declare no potential conflicts of interest.

630

631 **Authors' Contributions**

632 **A.A. Alahmari:** Conceptualization, methodology, investigation, data analysis, writing—original  
633 draft, writing—review and editing. **A.H. Chaubey:** Investigation. **A.A. Tisdale:** Investigation. **C.D.**  
634 **Schwarz:** Investigation. **A.C. Cornwell:** Investigation. **K.E. Maraszek:** Investigation. **E.J.**  
635 **Paterson:** Investigation. **M. Kim:** Investigation. **S. Venkat:** Investigation, bioinformatics analysis.  
636 **E.C. Gomez:** Bioinformatics analysis. **J. Wang:** Bioinformatics analysis. **K.V. Gurova:**  
637 Resources. **M.E. Feigin:** Conceptualization, supervision, funding acquisition, project  
638 administration, writing—review and editing.

639

640 **Acknowledgements**

641 This work was supported by National Cancer Institute (National Institutes of Health) grants P30  
642 CA016056 and R25 CA181003, an award from the Roswell Park Alliance Foundation to M.E.F.,  
643 and a scholarship and support to A.A.A. from Prince Sattam bin Abdulaziz University in Saudi  
644 Arabia, the Saudi Arabian Cultural Mission in the USA, and the Office of International  
645 Collaborations in Oncology at Roswell Park Comprehensive Cancer Center. M.E.F. is supported  
646 by a Research Scholar Grant, RSG-21-014-01 - RMC, from the American Cancer Society. We  
647 thank the Roswell Park Genomics and Small Molecule Screening Shared Resources for their  
648 assistance. We thank Safina Alfya for her help with the MNase experiment and Brian Buckley for  
649 assistance in imaging HeLa-TI cells. We thank the members of the Abel Laboratory for their  
650 insightful comments and support.

651

652 **References**

- 653 1. Rush JE. Cancer Statistics. *Lancet*. 1925;206(5333):1036–7.
- 654 2. Kleeff J, Korc M, Apte M, La Vecchia C, Johnson CD, Biankin A V., et al. Pancreatic  
655 cancer. *Nat Rev Dis Prim*. 2016 Apr 21;2.
- 656 3. Collisson EA, Sadanandam A, Olson P, Gibb WJ, Truitt M, Gu S, et al. Subtypes of  
657 pancreatic ductal adenocarcinoma and their differing responses to therapy. *Nat Med*.  
658 2011;17(4):500–3.
- 659 4. Moffitt RA, Marayati R, Flate EL, Volmar KE, Loeza SGH, Hoadley KA, et al. Virtual  
660 microdissection identifies distinct tumor- and stroma-specific subtypes of pancreatic  
661 ductal adenocarcinoma. *Nat Genet*. 2015;47(10):1168–78.
- 662 5. Bailey P, Chang DK, Nones K, Johns AL, Patch AM, Gingras MC, et al. Genomic  
663 analyses identify molecular subtypes of pancreatic cancer. *Nature*. 2016;531(7592):47–  
664 52.
- 665 6. Peng J, Sun BF, Chen CY, Zhou JY, Chen YS, Chen H, et al. Single-cell RNA-seq  
666 highlights intra-tumoral heterogeneity and malignant progression in pancreatic ductal  
667 adenocarcinoma. *Cell Res [Internet]*. 2019;29(9):725–38. Available from:  
668 <http://dx.doi.org/10.1038/s41422-019-0195-y>
- 669 7. Wang L, Yang H, Zamperone A, Diolaiti D, Palmboos PL, Abel E V., et al. ATDC is  
670 required for the initiation of KRAS-induced pancreatic tumorigenesis. *Genes Dev*  
671 *[Internet]*. 2019 Jun 1;33(11–12):641–55. Available from:  
672 <http://genesdev.cshlp.org/lookup/doi/10.1101/gad.323303.118>
- 673 8. Abel E V., Goto M, Magnuson B, Abraham S, Ramanathan N, Hotaling E, et al. HNF1A is  
674 a novel oncogene that regulates human pancreatic cancer stem cell properties. *Elife*.  
675 2018;7:1–35.
- 676 9. Roe J-S, Hwang C-I, Somerville TDD, Milazzo JP, Lee EJ, Da Silva B, et al. Enhancer  
677 Reprogramming Promotes Pancreatic Cancer Metastasis. *Cell [Internet]*. 2017  
678 Aug;170(5):875-888.e20. Available from:  
679 <https://linkinghub.elsevier.com/retrieve/pii/S0092867417308140>

- 680 10. Sodir NM, Kortlever RM, Barthet VJA, Campos T, Pellegrinet L, Kupczak S, et al. MYC  
681 Instructs and Maintains Pancreatic Adenocarcinoma Phenotype. *Cancer Discov.*  
682 2020;10(4):588–607.
- 683 11. Shankar S, Pitchiaya S, Malik R, Kothari V, Hosono Y, Yocum AK, et al. KRAS Engages  
684 AGO2 to Enhance Cellular Transformation. *Cell Rep [Internet]*. 2016 Feb;14(6):1448–61.  
685 Available from: <https://linkinghub.elsevier.com/retrieve/pii/S2211124716000553>
- 686 12. Venkat S, Alahmari AA, Feigin ME. Drivers of Gene Expression Dysregulation in  
687 Pancreatic Cancer. *Trends in Cancer [Internet]*. 2021 Apr 26;1–12. Available from:  
688 <https://doi.org/10.1016/j.trecan.2021.01.008>
- 689 13. Gruber AJ, Zavolan M. Alternative cleavage and polyadenylation in health and disease.  
690 *Nat Rev Genet [Internet]*. 2019; Available from: [http://dx.doi.org/10.1038/s41576-019-](http://dx.doi.org/10.1038/s41576-019-0145-z)  
691 0145-z
- 692 14. Yuan F, Hankey W, Wagner EJ, Li W, Wang Q. Alternative polyadenylation of mRNA and  
693 its role in cancer. *Genes and Diseases*. Chongqing University; 2019.
- 694 15. Masamha CP, Wagner EJ. The contribution of alternative polyadenylation to the cancer  
695 phenotype. *Carcinogenesis*. 2018;39(1):2–10.
- 696 16. Venkat S, Tisdale AA, Schwarz JR, Alahmari AA, Maurer HC, Olive KP, et al. Alternative  
697 polyadenylation drives oncogenic gene expression in pancreatic ductal adenocarcinoma.  
698 *Genome Res*. 2020;1–14.
- 699 17. Sullivan KD, Steiniger M, Marzluff WF. A Core Complex of CPSF73, CPSF100, and  
700 Symplekin May Form Two Different Cleavage Factors for Processing of Poly(A) and  
701 Histone mRNAs. *Mol Cell [Internet]*. 2009;34(3):322–32. Available from:  
702 <http://dx.doi.org/10.1016/j.molcel.2009.04.024>
- 703 18. Kakegawa J, Sakane N, Suzuki K, Yoshida T. JTE-607, a multiple cytokine production  
704 inhibitor, targets CPSF3 and inhibits pre-mRNA processing. *Biochem Biophys Res*  
705 *Commun [Internet]*. 2019;518(1):32–7. Available from:  
706 <https://doi.org/10.1016/j.bbrc.2019.08.004>
- 707 19. Ross NT, Lohmann F, Carbonneau S, Fazal A, Weihofen WA, Gleim S, et al. CPSF3-

- 708 dependent pre-mRNA processing as a druggable node in AML and Ewing's sarcoma. *Nat*  
709 *Chem Biol.* 2020 Jan 1;16(1):50–9.
- 710 20. Uesato N, Fukui K, Maruhashi J, Tojo A, Tajima N. JTE-607, a multiple cytokine  
711 production inhibitor, ameliorates disease in a SCID mouse xenograft acute myeloid  
712 leukemia model. *Exp Hematol.* 2006;34(10):1385–92.
- 713 21. Tajima N, Fukui K, Uesato N, Maruhashi J, Yoshida T, Watanabe Y, et al. JTE-607, a  
714 multiple cytokine production inhibitor, induces apoptosis accompanied by an increase in  
715 p21waf1/cip1 in acute myelogenous leukemia cells. *Cancer Sci.* 2010;101(3):774–81.
- 716 22. Borozdenkova S, Mant TGK, Allen E, Pu K, Hoshino S, Jurcevic S. Effects of a cytokine  
717 inhibitor, JTE-607, on the response to endotoxin in healthy human volunteers. *Int*  
718 *Immunopharmacol* [Internet]. 2011;11(11):1837–43. Available from:  
719 <http://dx.doi.org/10.1016/j.intimp.2011.07.013>
- 720 23. Xia Z, Donehower LA, Cooper TA, Neilson JR, Wheeler DA, Wagner EJ, et al. Dynamic  
721 analyses of alternative polyadenylation from RNA-seq reveal a 3'-UTR landscape  
722 across seven tumour types. *Nat Commun.* 2014;5.
- 723 24. Safina A, Cheney P, Pal M, Brodsky L, Ivanov A, Kirsanov K, et al. FACT is a sensor of  
724 DNA torsional stress in eukaryotic cells. *Nucleic Acids Res.* 2017;45(4):1925–45.
- 725 25. Cao L, Huang C, Cui Zhou D, Hu Y, Lih TM, Savage SR, et al. Proteogenomic  
726 characterization of pancreatic ductal adenocarcinoma. *Cell.* 2021;184(19):5031-  
727 5052.e26.
- 728 26. Mayr C. What Are 3' UTRs Doing? *Cold Spring Harb Perspect Biol.* 2018;a034728.
- 729 27. Tian B, Manley JL. Alternative polyadenylation of mRNA precursors. *Nat Rev Mol Cell*  
730 *Biol* [Internet]. 2016;18(1):18–30. Available from: <http://dx.doi.org/10.1038/nrm.2016.116>
- 731 28. Elkon R, Ugalde AP, Agami R. Alternative cleavage and polyadenylation: Extent,  
732 regulation and function. *Nat Rev Genet.* 2013;14(7):496–506.
- 733 29. Li SZ, Hu YY, Zhao JL, Zang J, Fei Z, Han H, et al. Downregulation of FHL1 protein in  
734 glioma inhibits tumor growth through PI3K/AKT signaling. *Oncol Lett.* 2020;19(6):3781–8.



- 735 30. Wang J, Huang F, Huang J, Kong J, Liu S, Jin J. Epigenetic analysis of FHL1 tumor  
736 suppressor gene in human liver cancer. *Oncol Lett.* 2017;14(5):6109–16.
- 737 31. Asada K, Ando T, Niwa T, Nanjo S, Watanabe N, Okochi-Takada E, et al. FHL1 on  
738 chromosome X is a single-hit gastrointestinal tumor-suppressor gene and contributes to  
739 the formation of an epigenetic field defect. *Oncogene.* 2013;32(17):2140–9.
- 740 32. Liu Y, Wang C, Cheng P, Zhang S, Zhou W, Xu Y, et al. FHL1 inhibits the progression of  
741 colorectal cancer by regulating the Wnt/ $\beta$ -catenin signaling pathway. *J Cancer.*  
742 2021;12(17):5345–54.
- 743 33. Cowling BS, McGrath MJ, Nguyen M-A, Cottle DL, Kee AJ, Brown S, et al. Identification  
744 of FHL1 as a regulator of skeletal muscle mass: implications for human myopathy. *J Cell*  
745 *Biol* [Internet]. 2008 Dec 15;183(6):1033–48. Available from:  
746 [https://rupress.org/jcb/article/183/6/1033/35367/Identification-of-FHL1-as-a-regulator-of-](https://rupress.org/jcb/article/183/6/1033/35367/Identification-of-FHL1-as-a-regulator-of-skeletal)  
747 [skeletal](https://rupress.org/jcb/article/183/6/1033/35367/Identification-of-FHL1-as-a-regulator-of-skeletal)
- 748 34. Ding L, Wang Z, Yan J, Yang X, Liu A, Qiu W, et al. Human four-and-a-half LIM family  
749 members suppress tumor cell growth through a TGF- $\beta$ -like signaling pathway. *J Clin*  
750 *Invest.* 2009;119(2):349–61.
- 751 35. Ding L, Niu C, Zheng Y, Xiong Z, Liu Y, Lin J, et al. FHL1 interacts with oestrogen  
752 receptors and regulates breast cancer cell growth. *J Cell Mol Med.* 2011;15(1):72–85.
- 753 36. Marzluff WF, Wagner EJ, Duronio RJ. Metabolism and regulation of canonical histone  
754 mRNAs: Life without a poly(A) tail. *Nat Rev Genet.* 2008;9(11):843–54.
- 755 37. Wagner EJ, Burch BD, Godfrey AC, Salzler HR, Duronio RJ, Marzluff WF. A Genome-  
756 wide RNA Interference Screen Reveals that Variant Histones Are Necessary for  
757 Replication-Dependent Histone Pre-mRNA Processing. *Mol Cell.* 2007;28(4):692–9.
- 758 38. Yang X, Sun Y, Aik WS, Marzluff WF, Tong L, Dominski Z. Studies with recombinant U7  
759 snRNP demonstrate that CPSF73 is both an endonuclease and a 5'-3' exonuclease. *Rna.*  
760 2020;rna.076273.120.
- 761 39. Romeo V, Griesbach E, Schümperli D. CstF64: Cell Cycle Regulation and Functional  
762 Role in 3' End Processing of Replication-Dependent Histone mRNAs. *Mol Cell Biol.*

- 763 2014;34(23):4272–84.
- 764 40. Sullivan KD, Mullen TE, Marzluff WF, Wagner EJ. Knockdown of SLBP results in nuclear  
765 retention of histone mRNA. *Rna*. 2009;15(3):459–72.
- 766 41. Gunjan A, Paik J, Verreault A. Regulation of histone synthesis and nucleosome  
767 assembly. *Biochimie*. 2005;87(7):625–35.
- 768 42. Groth A, Corpet A, Cook AJL, Roche D, Bartek J, Lukas J, et al. Regulation of replication  
769 fork progression through histone supply and demand. *Science* (80- ).  
770 2007;318(5858):1928–31.
- 771 43. Günesdogan U, Jäckle H, Herzig A. Histone supply regulates S phase timing and cell  
772 cycle progression. *Elife*. 2014;3:e02443.
- 773 44. Xiao L, Somers K, Murray J, Pandher R, Karsa M, Ronca E, et al. Dual targeting of  
774 chromatin stability by the curaxin CBL0137 and histone deacetylase inhibitor  
775 panobinostat shows significant preclinical efficacy in neuroblastoma. *Clin Cancer Res*.  
776 2021;27(15):4338–52.
- 777 45. Luo J, Solimini NL, Elledge SJ. Principles of Cancer Therapy: Oncogene and Non-  
778 oncogene Addiction. *Cell*. 2009;136(5):823–37.
- 779 46. Hanahan D. Hallmarks of Cancer : New Dimensions. 2022;(January):31–47.
- 780 47. Mayr C, Bartel DP. Widespread Shortening of 3'UTRs by Alternative Cleavage and  
781 Polyadenylation Activates Oncogenes in Cancer Cells. *Cell* [Internet]. 2009;138(4):673–  
782 84. Available from: <http://dx.doi.org/10.1016/j.cell.2009.06.016>
- 783 48. Lee SH, Singh I, Tisdale S, Abdel-Wahab O, Leslie CS, Mayr C. Widespread intronic  
784 polyadenylation inactivates tumour suppressor genes in leukaemia. Vol. 561, *Nature*.  
785 Nature Publishing Group; 2018. p. 127–31.
- 786 49. Xiang Y, Ye Y, Lou Y, Yang Y, Cai C, Zhang Z, et al. Comprehensive characterization of  
787 alternative polyadenylation in human cancer. *J Natl Cancer Inst*. 2018;110(4):379–89.
- 788 50. Zhang L, Zhang W. Knockdown of NUDT21 inhibits proliferation and promotes apoptosis  
789 of human K562 leukemia cells through ERK pathway. *Cancer Manag Res*.

- 790 2018;10:4311–23.
- 791 51. Chen X, Zhang JX, Luo JH, Wu S, Yuan GJ, Ma NF, et al. CSTF2-induced shortening of  
792 the RAC1 3'UTR promotes the pathogenesis of urothelial carcinoma of the bladder.  
793 *Cancer Res.* 2018;78(20):5848–62.
- 794 52. Xiong M, Chen L, Zhou L, Ding Y, Kazobinka G, Chen Z, et al. NUDT21 promotes  
795 bladder cancer progression through ANXA2 and LIMK2 by alternative polyadenylation.  
796 *Theranostics.* 2019;9(24):7156–67.
- 797 53. Li N, Jiang S, Fu R, Lv J, Yao J, Mai J, et al. Cleavage and polyadenylation-specific  
798 factor 3 induces cell cycle arrest via PI3K/Akt/GSK-3 $\beta$  signaling pathways and predicts a  
799 negative prognosis in hepatocellular carcinoma. *Biomark Med.* 2021;15(5):347–58.
- 800 54. Ning Y, Liu W, Guan X, Xie X, Zhang Y. CPSF3 is a promising prognostic biomarker and  
801 predicts recurrence of non-small cell lung cancer. *Oncol Lett.* 2019;18(3):2835–44.
- 802 55. Park HJ, Ji P, Kim S, Xia Z, Rodriguez B, Li L, et al. 3' UTR shortening represses tumor-  
803 suppressor genes in trans by disrupting ceRNA crosstalk. *Nat Genet.* 2018 Jun  
804 1;50(6):783–9.
- 805 56. Li X, Ding J, Wang X, Cheng Z, Zhu Q. NUDT21 regulates circRNA cyclization and  
806 ceRNA crosstalk in hepatocellular carcinoma. *Oncogene [Internet].* 2020;39(4):891–904.  
807 Available from: <http://dx.doi.org/10.1038/s41388-019-1030-0>
- 808 57. Fang S, Zhang D, Weng W, Lv X, Zheng L, Chen M, et al. CPSF7 regulates liver cancer  
809 growth and metastasis by facilitating WWP2-FL and targeting the WWP2/PTEN/AKT  
810 signaling pathway. *Biochim Biophys Acta - Mol Cell Res.* 2020 Feb 1;1867(2).
- 811 58. Tan S, Ding K, Chong QY, Zhao J, Liu Y, Shao Y, et al. Post-transcriptional regulation of  
812 ERBB2 by miR26a/b and HuR confers resistance to tamoxifen in estrogen receptor-  
813 positive breast cancer cells. *J Biol Chem.* 2017;292(33):13551–64.
- 814 59. Arnadottir GA, Oddsson A, Jensson BO, Gisladdottir S, Simon MT, Arnthorsson AO, et al.  
815 Population-level deficit of homozygosity unveils CPSF3 as an intellectual disability  
816 syndrome gene. *Nat Commun.* 2022;13(1).
- 817 60. Zhang B, Liu Y, Liu D, Yang L. Targeting cleavage and polyadenylation specific factor 1

- 818 via shRNA inhibits cell proliferation in human ovarian cancer. *J Biosci.* 2017 Sep  
819 1;42(3):417–25.
- 820 61. Brumbaugh J, Di Stefano B, Wang X, Borkent M, Forouzmand E, Clowers KJ, et al.  
821 Nudt21 Controls Cell Fate by Connecting Alternative Polyadenylation to Chromatin  
822 Signaling. *Cell* [Internet]. 2018;172(1–2):106–120.e21. Available from:  
823 <https://doi.org/10.1016/j.cell.2017.11.023>
- 824 62. Tan S, Li H, Zhang W, Shao Y, Liu Y, Guan H, et al. NUDT21 negatively regulates  
825 PSMB2 and CXXC5 by alternative polyadenylation and contributes to hepatocellular  
826 carcinoma suppression. *Oncogene* [Internet]. 2018;37(35):4887–900. Available from:  
827 <http://dx.doi.org/10.1038/s41388-018-0280-6>
- 828 63. Chu Y, Elrod N, Wang C, Li L, Chen T, Routh A, et al. Nudt21 regulates the alternative  
829 polyadenylation of Pak1 and is predictive in the prognosis of glioblastoma patients.  
830 *Oncogene* [Internet]. 2019;38(21):4154–68. Available from:  
831 <http://dx.doi.org/10.1038/s41388-019-0714-9>
- 832 64. Masamha CP, Xia Z, Yang J, Albrecht TR, Li M, Shyu A Bin, et al. CFIm25 links  
833 alternative polyadenylation to glioblastoma tumour suppression. *Nature.*  
834 2014;510(7505):412–6.
- 835 65. Ryugo M, Sawa Y, Ono M, Miyamoto Y, Aleshin AN, Matsuda H. Pharmacologic  
836 preconditioning of JTE-607, a novel cytokine inhibitor, attenuates ischemia-reperfusion  
837 injury in the myocardium. *J Thorac Cardiovasc Surg.* 2004;127(6):1723–7.
- 838 66. Asaga T, Ueki M, Chujo K, Taie S. JTE-607, an inflammatory cytokine synthesis inhibitor,  
839 attenuates ischemia/reperfusion-induced renal injury by reducing neutrophil activation in  
840 rats. *J Biosci Bioeng.* 2008;106(1):22–6.
- 841 67. Kakutani M, Takeuchi K, Waga I, Iwamura H, Wakitani K. JTE-607, a novel inflammatory  
842 cytokine synthesis inhibitor without immunosuppression, protects from endotoxin shock in  
843 mice. *Inflamm Res* [Internet]. 1999 Aug 1;48(8):461–8. Available from:  
844 <http://link.springer.com/10.1007/s000110050487>
- 845 68. Luo H, Zhu G, Eshelman MA, Fung TK, Lai Q, Wang F, et al. HOTTIP-dependent R-loop  
846 formation regulates CTCF boundary activity and TAD integrity in leukemia. *Mol Cell*

- 847 [Internet]. 2022;82(4):833-851.e11. Available from:  
848 <https://doi.org/10.1016/j.molcel.2022.01.014>
- 849 69. Gorthi A, Romero JC, Loranc E, Cao L, Lawrence LA, Goodale E, et al. EWS-FLI1  
850 increases transcription to cause R-Loops and block BRCA1 repair in Ewing sarcoma.  
851 Nature. 2018;555(7696):387–91.
- 852 70. Stirling PC, Chan YA, Minaker SW, Aristizabal MJ, Barrett I, Sipahimalani P, et al. R-  
853 loop-mediated genome instability in mRNA cleavage and polyadenylation mutants.  
854 Genes Dev. 2012;26(2):163–75.
- 855 71. Yang X-C, Sabath I, Debski J, Kaus-Drobek M, Dadlez M, Marzluff WF, et al. A Complex  
856 Containing the CPSF73 Endonuclease and Other Polyadenylation Factors Associates  
857 with U7 snRNP and Is Recruited to Histone Pre-mRNA for 3'-End Processing. Mol Cell  
858 Biol. 2013;33(1):28–37.
- 859 72. Gutierrez PA, Baughman K, Sun Y, Tong L. A real-time fluorescence assay for CPSF73,  
860 the nuclease for pre-mRNA 3'-end processing. Rna. 2021;27(10):1148–54.
- 861 73. Sun Y, Zhang Y, Aik WS, Yang XC, Marzluff WF, Walz T, et al. Structure of an active  
862 human histone pre-mRNA 3'-end processing machinery. Science (80- ).  
863 2020;367(6478):700–3.
- 864 74. Armstrong C, Spencer SL. Replication-dependent histone biosynthesis is coupled to cell-  
865 cycle commitment. Proc Natl Acad Sci U S A. 2021;118(31):1–8.
- 866 75. Zhao X, McKillop-Smith S, Müller B. The human histone gene expression regulator  
867 HBP/SLBP is required for histone and DNA synthesis, cell cycle progression and cell  
868 proliferation in mitotic cells. J Cell Sci. 2004;117(25):6043–51.
- 869 76. Marzluff WF, Pandey NB. Multiple regulatory steps control histone mRNA concentrations.  
870 Trends Biochem Sci. 1988 Feb;13(2):49–52.
- 871 77. Osley MA. The regulation of histone synthesis in the cell cycle. Annu Rev Biochem.  
872 1991;60:827–61.
- 873 78. Mendiratta S, Gatto A, Almouzni G. Histone supply: Multitiered regulation ensures  
874 chromatin dynamics throughout the cell cycle. J Cell Biol. 2019;218(1):39–54.

- 875 79. Barcaroli D, Bongiorno-Borbone L, Terrinoni A, Hofmann TG, Rossi M, Knight RA, et al.  
876 FLASH is required for histone transcription and S-phase progression. Proc Natl Acad Sci  
877 U S A. 2006;103(40):14808–12.
- 878 80. Groth A, Ray-Gallet D, Quivy JP, Lukas J, Bartek J, Almouzni G. Human Asf1 regulates  
879 the flow of S phase histones during replicational stress. Mol Cell. 2005;17(2):301–11.
- 880 81. Brazelle W, Krehling JM, Gemmer J, Ma Y, Douglas Cress W, Haura E, et al. Histone  
881 deacetylase inhibitors downregulate checkpoint kinase 1 expression to induce cell death  
882 in non-small cell lung cancer cells. PLoS One. 2010;5(12).

883

884

885

886

887 **Figure Legends**

888 **Figure 1. CPSF3 is highly expressed in PDAC patients and predicts poor prognosis. A,**  
889 *CPSF3* expression from CPTAC PDAC patient data. Whiskers indicate minimum and maximum  
890 data points. \*\*\*,  $P < 0.0001$ , Ordinary one-way ANOVA with Tukey multiple comparisons test. **B,**  
891 *CPSF3* expression from PDAC patient data (TCGA) as compared to normal pancreas (GTEx).  
892 Whiskers indicate minimum and maximum data points. \*\*\*,  $P < 0.0001$ , unpaired t test with Welch's  
893 correction. **C,** Kaplan Meier survival curves of PDAC patients with high and low *CPSF3* mRNA  
894 levels. Data were obtained from CPTAC database. **D,** Quantitative RT-PCR showing *CPSF3*  
895 mRNA expression levels in non-transformed pancreatic epithelial and PDAC cells. Data are  
896 shown as mean $\pm$ SEM. \*,  $P < 0.05$ , unpaired t test with Welch's correction. **E,** Immunoblotting of  
897 *CPSF3* in non-transformed pancreatic epithelial cells and PDAC cells. *CPSF3* protein levels were  
898 normalized to its corresponding GAPDH levels. Fold change compares normalized data of  
899 different cell lines to HPNE.

900  
901 **Figure 2. CPSF3 is required for PDAC cancer cell proliferation. A,** mRNA expression of  
902 *CPSF3* in shNTC, sh1 *CPSF3* and sh2 *CPSF3* knockdown cells by qPCR. Graphs are  
903 representative of at least two independent experiments. Data are shown as mean $\pm$ SEM of  
904 technical duplicates. \*\*,  $P < 0.01$ , Ordinary one-way ANOVA with Dunnett's multiple comparisons  
905 test. **B,** Immunoblotting of *CPSF3* in shNTC, sh1 and sh2 *CPSF3* knockdown cells. **C,**  
906 Proliferation rates at days 0, 2, 4 and 6 of shNTC, sh1 and sh2 *CPSF3* knockdown cells. \*\*,  $P <$   
907 0.01; \*\*\*,  $P < 0.001$ ; 2way ANOVA with Dunnett's multiple comparisons test. **D,** Clonogenic growth  
908 assay of shNTC, sh1 and sh2 *CPSF3* knockdown cells. **E,** Normalized colony area percentage of  
909 shNTC, sh1 and sh2 *CPSF3* knockdown cells from **(D)**. \*,  $P < 0.05$ ; \*\*,  $P < 0.01$ ; \*\*\*,  $P < 0.001$ ;  
910 Ordinary one-way ANOVA with Dunnett's multiple comparisons test. **F,** Volume of *CPSF3*-  
911 knockdown and control MiaPaCa2 tumors. \*\*\*,  $P < 0.001$ , 2way ANOVA. **G,** Endpoint tumor  
912 weight. \*,  $P < 0.05$ , unpaired t test with Welch's correction. **H,** Gross images of shNTC (n=7) and  
913 sh*CPSF3* (n=6) dissected tumors. **I,** Hematoxylin and Eosin (H&E) staining of xenograft tumors.  
914 **J** and **K,** IHC for *CPSF3* and Ki67, respectively. Box and whisker plots indicate the percentage of  
915 *CPSF3*- and Ki67-positive areas in the tumors. \*\*,  $P < 0.01$ ; \*\*\*,  $P < 0.001$ ; unpaired t test.

916  
917 **Figure 3. CPSF3 knockdown drives global APA dysregulation in PDAC. A,** PDUI score of  
918 each gene in shNTC and sh*CPSF3* cells. Dashed lines represent 0.1 cutoffs. Blue dots represent  
919 3'-UTR-lengthened genes, and red dots represent 3'-UTR-shortened genes. **B,** Genes showing  
920 lengthening (right) or shortening (left) events ( $-0.1 > \text{PDUI} > 0.1$ ;  $P < 0.05$ ) and are differentially

921 expressed (FDR<0.05; fold change >1.5) as color coded. Up=upregulated gene expression,  
922 Down=downregulated gene expression. **C**, *FHL1* DSeq2 normalized counts. \*\*\*,  $P < 0.0001$ . **D**,  
923 *FHL1* mRNA levels in *CPSF3* knockdown MiaPaCa2 cells. \*,  $P < 0.05$ , unpaired t test. **E**, 3'-  
924 RACE of *FHL1* in shNTC, sh1 and sh2 *CPSF3* Panc1 cells. Approximate length of the 3'-UTR  
925 form is denoted beside each band. **F**, Western blot of *FHL1* protein levels in shNTC, sh1 and sh2  
926 *CPSF3* Panc1 cells. **G**, *FHL1* mRNA levels in sh2 *CPSF3* Panc1 cells transfected with siRNA  
927 against *FHL1* (siFHL1). \*,  $P < 0.05$ , unpaired t test. **H**, Proliferation assay of siFHL1 in *CPSF3*  
928 knockdown and control Panc1 cells. \*\*,  $P < 0.01$ ; 2way ANOVA with Tukey multiple comparisons  
929 test. **I**, Correlation of *FHL1* with *CPSF3* mRNA levels from the CPTAC database. Spearman's  
930 correlation= -0.36.  $P < 0.0001$ .

931  
932 **Figure 4. PDAC cell lines are sensitive to CPSF3 inhibition by JTE-607.** **A**, IC50 of JTE-607  
933 on non-transformed and PDAC cell lines. **B**, IC50 of JTE-607 on human fibroblast C7 and PancPat  
934 CAFs. **C**, IC50 values. **D and E**, Proliferation rates at days 0, 2, 4 and 6 of non-transformed and  
935 PDAC cell lines after treatment with escalating concentrations of JTE-607. \*,  $P < 0.05$ ; 2way  
936 ANOVA with Dunnett's multiple comparisons test. Data are shown as mean±SEM. **F**, Clonogenic  
937 growth assay of PDAC cell lines after treatment with increasing concentration of JTE-607. **G**,  
938 Normalized colony area percentage of PDAC cell lines from (**F**). \*,  $P < 0.01$ ; \*\*,  $P < 0.001$ ; \*\*\*,  $P$   
939  $< 0.0001$ ; Ordinary one-way ANOVA with Dunnett's multiple comparisons test. Data are shown  
940 as mean±SEM.

941  
942 **Figure 5. JTE-607 induces global APA dysregulation and decreases histone expression in**  
943 **PDAC cells.** **A**, Changes in PDUI score ( $-0.1 > PDUI > 0.1$ ;  $P < 0.05$ ) denoting 3'-UTR-shortened  
944 (red) and lengthened (blue) genes. **B**, Genes showing lengthening (right) or shortening (left)  
945 events ( $-0.1 > PDUI > 0.1$ ;  $P < 0.05$ ) and are differentially expressed (FDR<0.05; fold change >1.5)  
946 as color coded. Up=upregulated gene expression, Down=downregulated gene expression. **C**,  
947 Venn diagram showing overlapping genes with significant APA alterations between JTE-607-  
948 treated and *CPSF3* knockdown cells. **D**, Heatmap of differentially expressed genes in Panc1 cells  
949 treated with JTE-607. Expression is plotted as transformed expression value. Blue triangles  
950 denote replication-dependent histone genes. **E**, Gene set enrichment analysis (GSEA) of RNA-  
951 seq data from (**D**). **F**, mRNA expression of *H2B* and *H3* in MiaPaCa2 cells treated with JTE-607.  
952 \*,  $P < 0.05$ , \*\*,  $P < 0.01$ , \*\*\*,  $P < 0.001$ , Ordinary one-way ANOVA with Dunnett's multiple  
953 comparisons test.

954



955 **Figure 6. JTE-607 induces replication-dependent histone transcription read-through. A,**  
956 IGV-generated density plots of replication-dependent histones highlighting the differences of 3'-  
957 UTR coverage between DMSO (red) and JTE-607 (blue) treated cells. **B,** Western blot of H2B  
958 and H3 protein levels in Panc1 cells treated with 0-10 $\mu$ M JTE-607 for 24 and 48hrs. **C,** IGV-  
959 generated density plots of replication-independent histones highlighting the differences of 3'-UTR  
960 coverage between DMSO (red) and JTE-607 (blue) treated cells. **D,** DSeq2 normalized counts of  
961 *H2AFZ* and *H3F3A* histone variants in Panc1 cells treated with JTE-607. \*\*,  $P < 0.001$ . **E-G,**  
962 Volcano plots of Spearman's correlation of CPSF3 and: **E,** all histone genes; **F,** replication-  
963 dependent histone genes; **G,** replication-independent histone genes. Each dot represents a  
964 histone gene. Blue and red dots denote positive and negative correlation, respectively.  
965 (Spearman =  $-0.15 > R > 0.15$ ,  $P < 0.05$ ).

966  
967 **Figure 7. JTE-607 induces chromatin instability. A,** Micrococcal Nuclease assay of Panc1 cells  
968 treated with JTE-607 or CBL0137. **B,** Quantification of nucleosome fragments after 30 minutes of  
969 MNase digestion. Data are shown as mean $\pm$ SEM of two technical repeats. \*,  $P < 0.05$ , unpaired  
970 t test with Welch's correction. **C,** GFP+ HeLa-TI cells following JTE-607 or CBL0137 treatment.  
971 **D,** Fold change of GFP+ HeLa-TI from **(C)**. \*\*\*,  $P < 0.0001$ ; 2way ANOVA with Tukey's multiple  
972 comparisons test. **E,** Flow cytometry analysis of GFP+ HeLa-TI cells following JTE-607 or  
973 CBL0137 treatment. Fold change is shown as mean $\pm$ SEM of two independent experiments. \*\*,  $P$   
974  $< 0.01$ , \*\*\*,  $P < 0.0001$ , Ordinary one-way ANOVA with Tukey's multiple comparisons test.

975  
976 **Figure 8. JTE-607 induces S-phase arrest. A and B,** Cell cycle distribution and quantification  
977 of Panc1, MiaPaCa2 and HPNE cell lines. \*,  $P < 0.05$ , \*\*,  $P < 0.001$ , \*\*\*,  $P < 0.0001$ , 2way ANOVA  
978 with Dunnett's multiple comparisons test. **C,** BrdU incorporation assay showing cell cycle  
979 population upon JTE-607 treatment.

# Figure 1

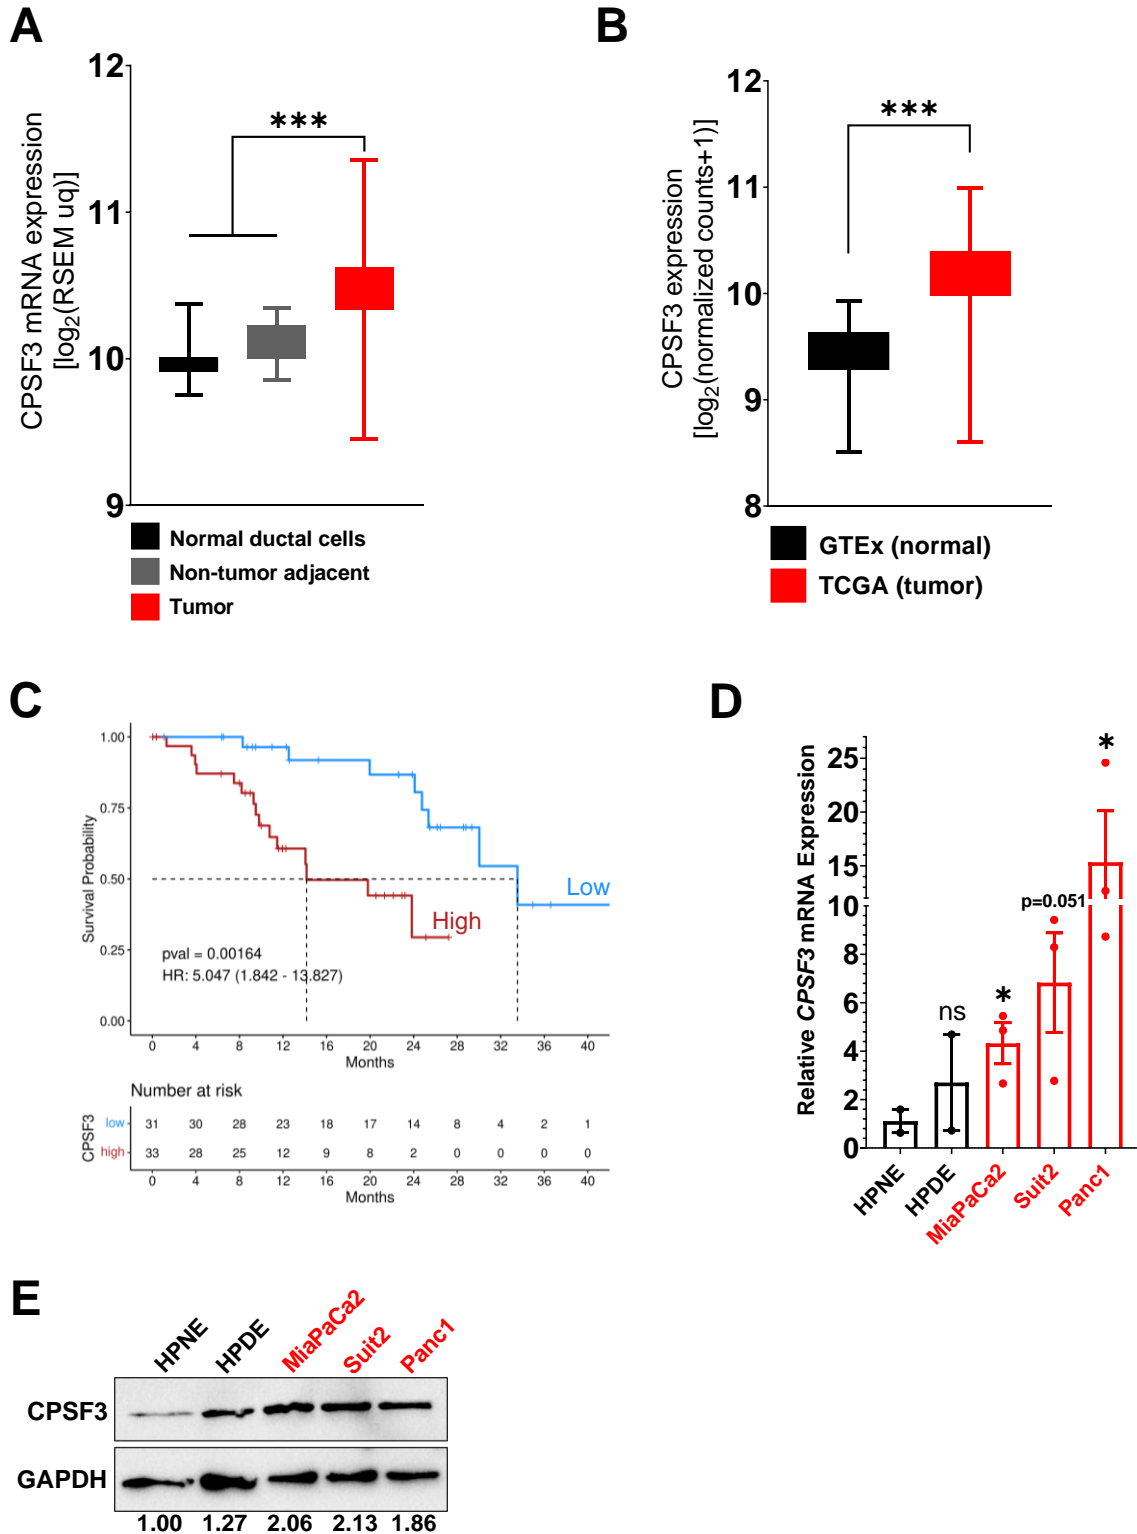

# Figure 2

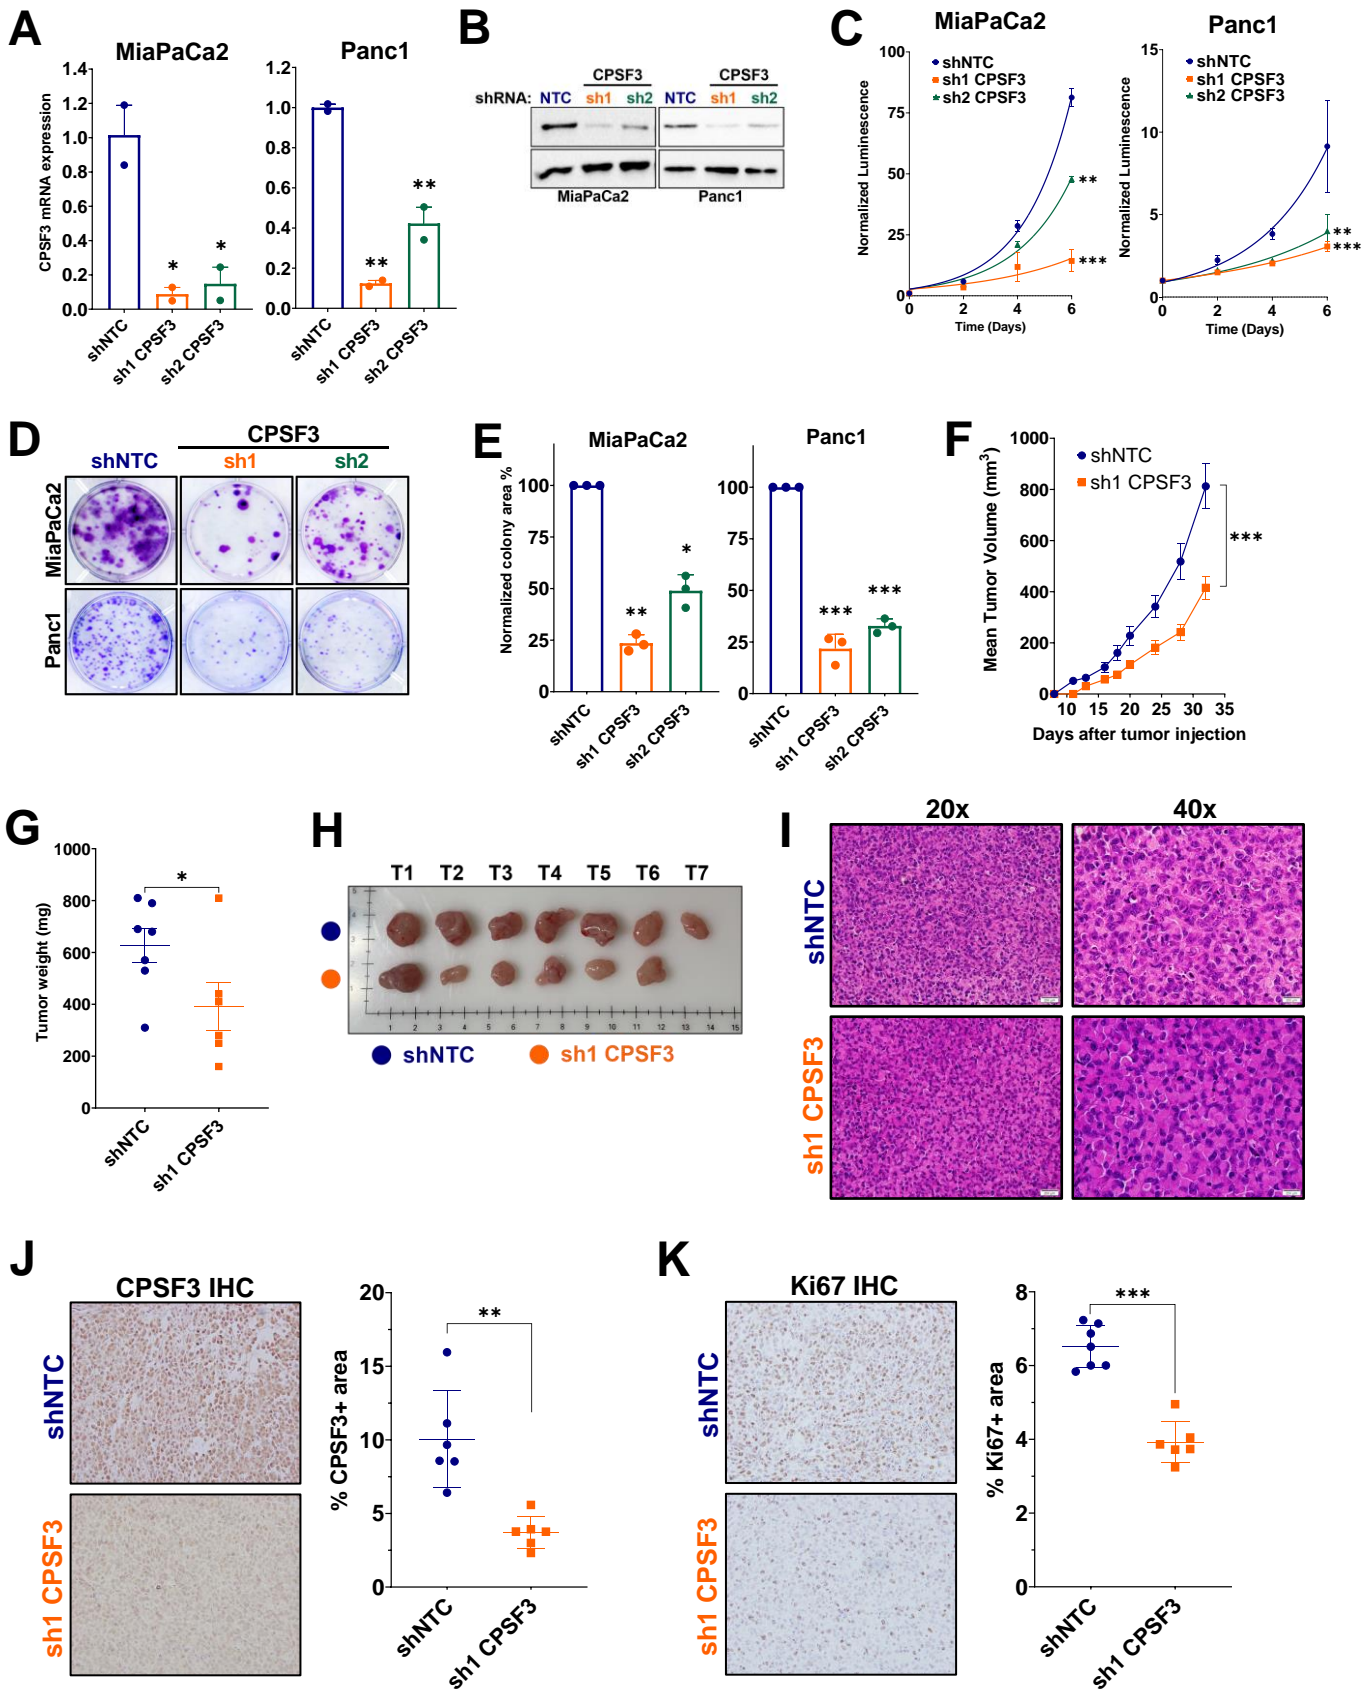

# Figure 3

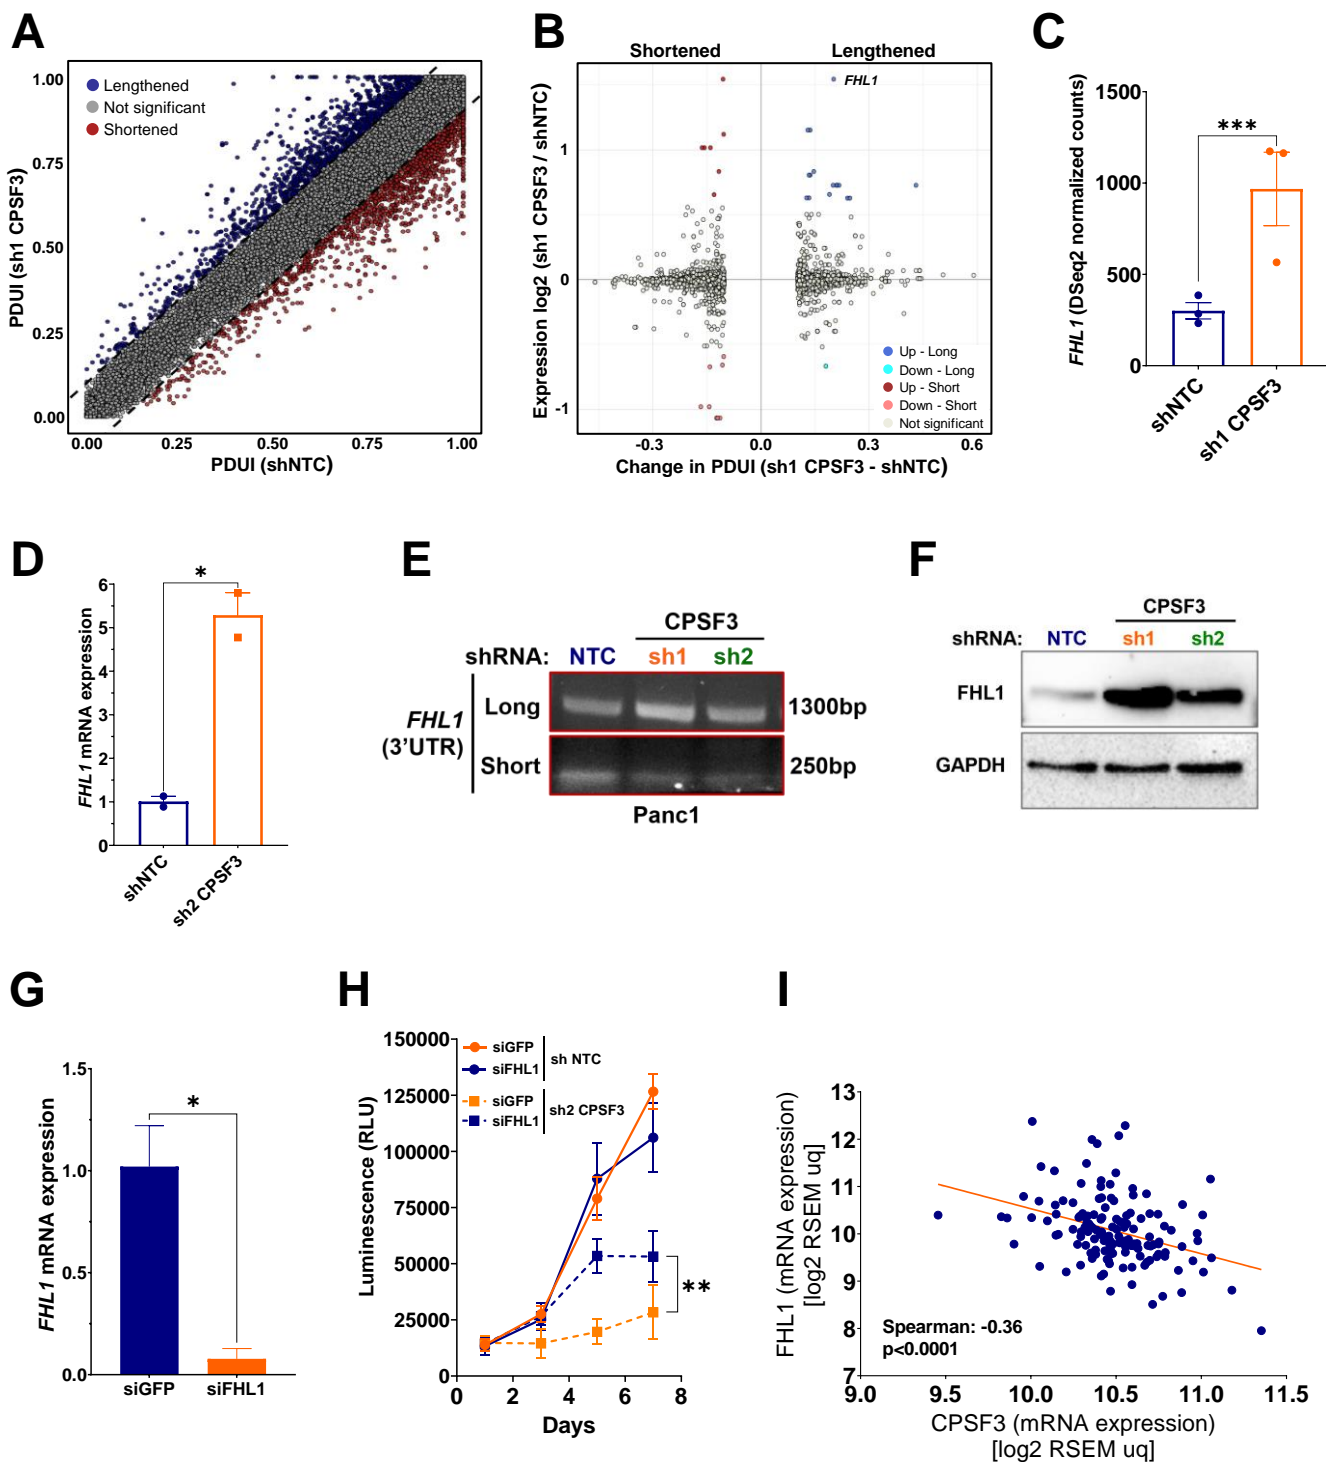

# Figure 4

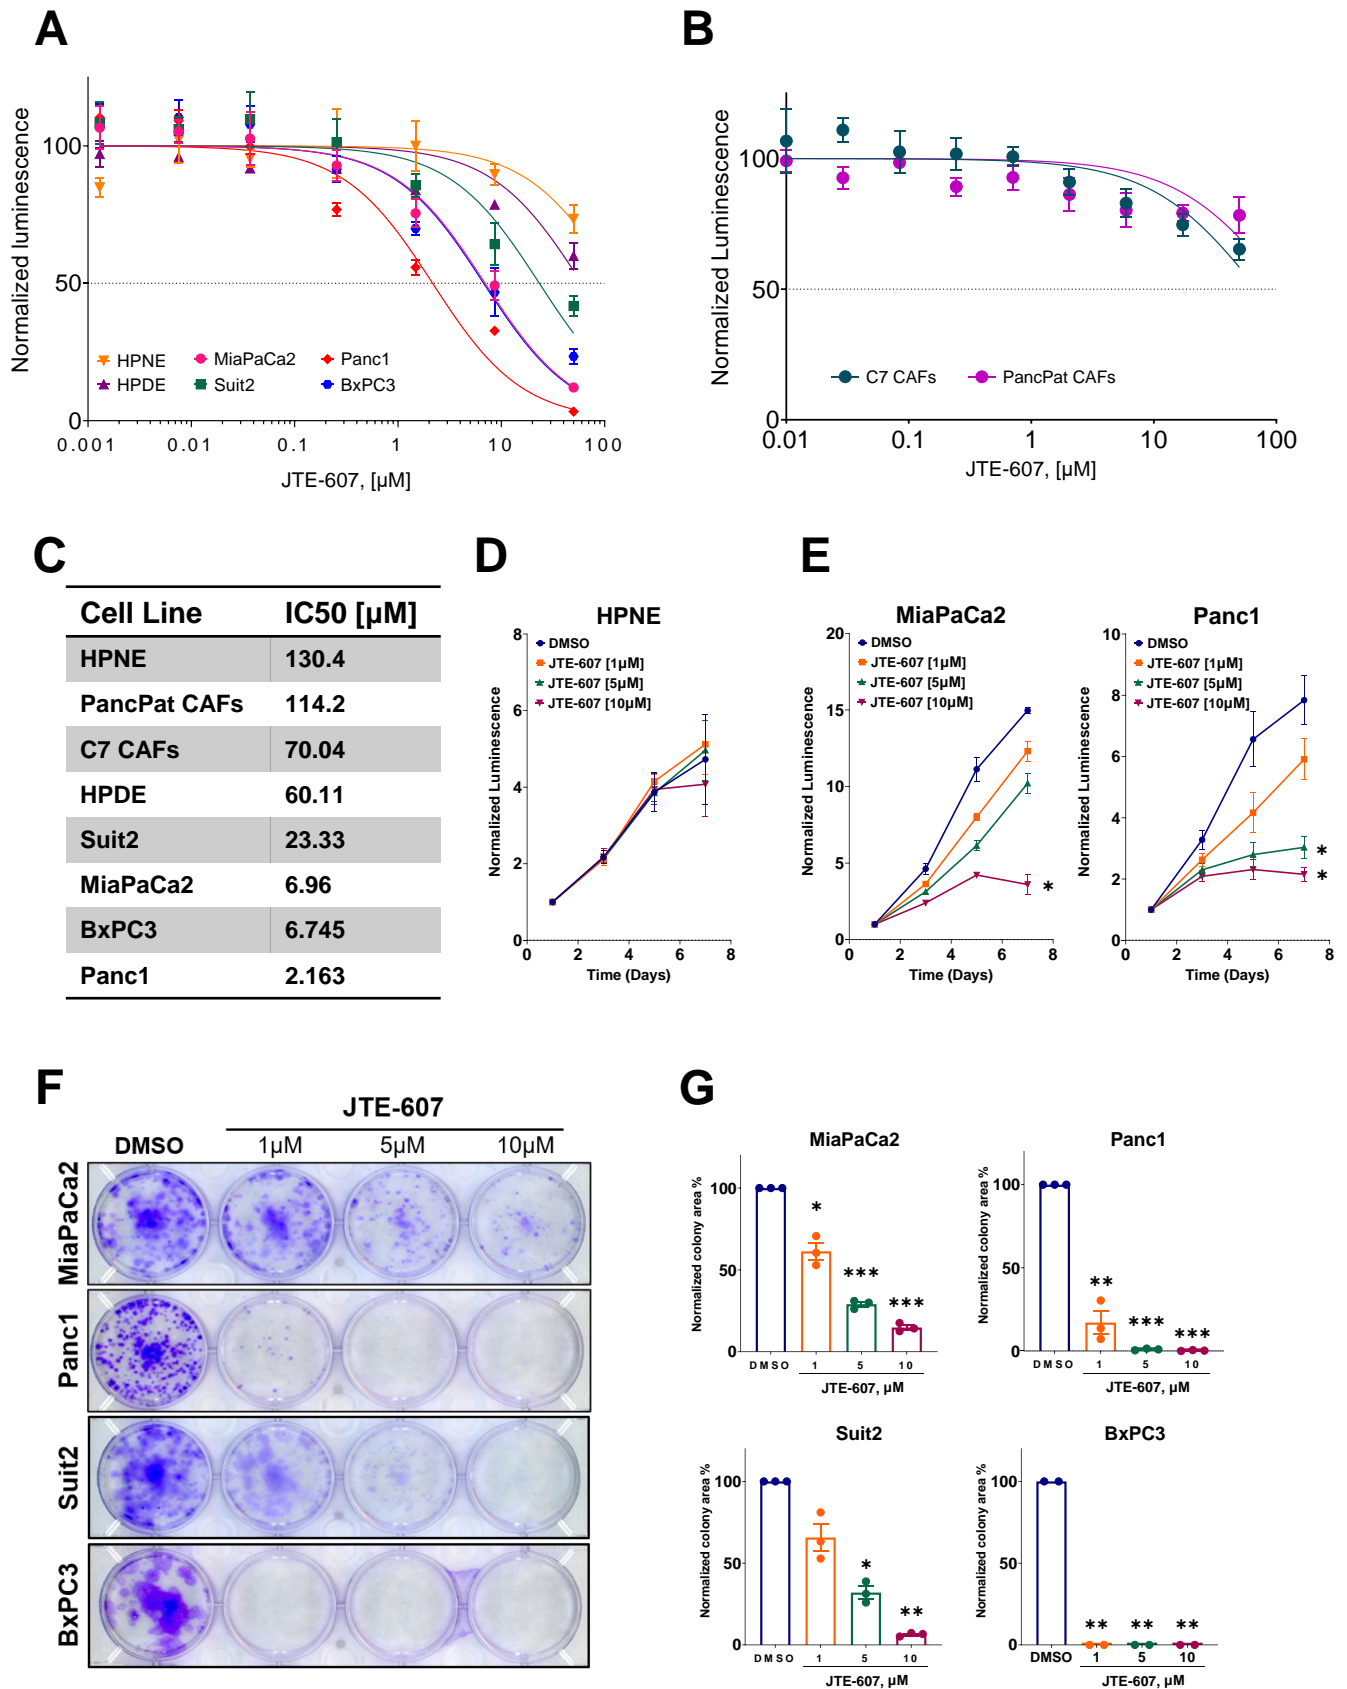

# Figure 5

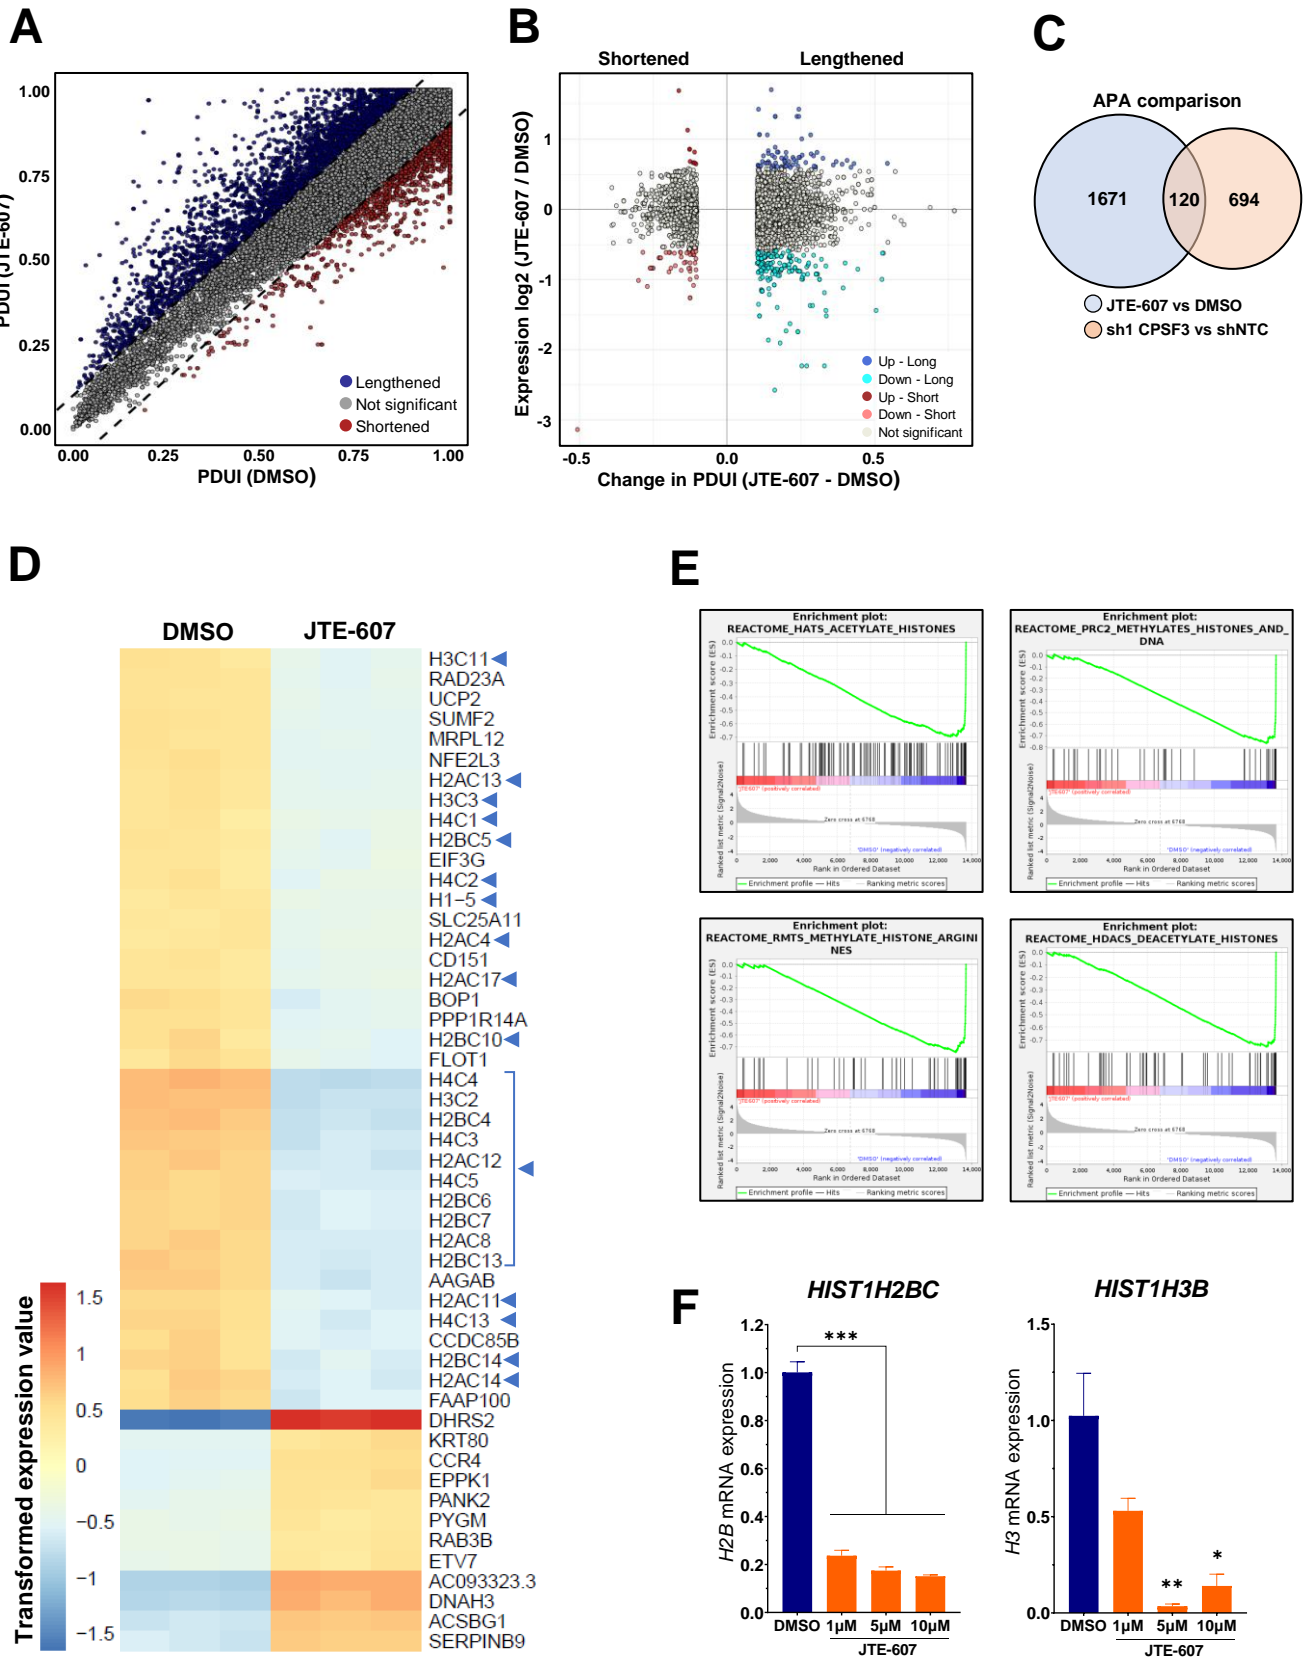

# Figure 6

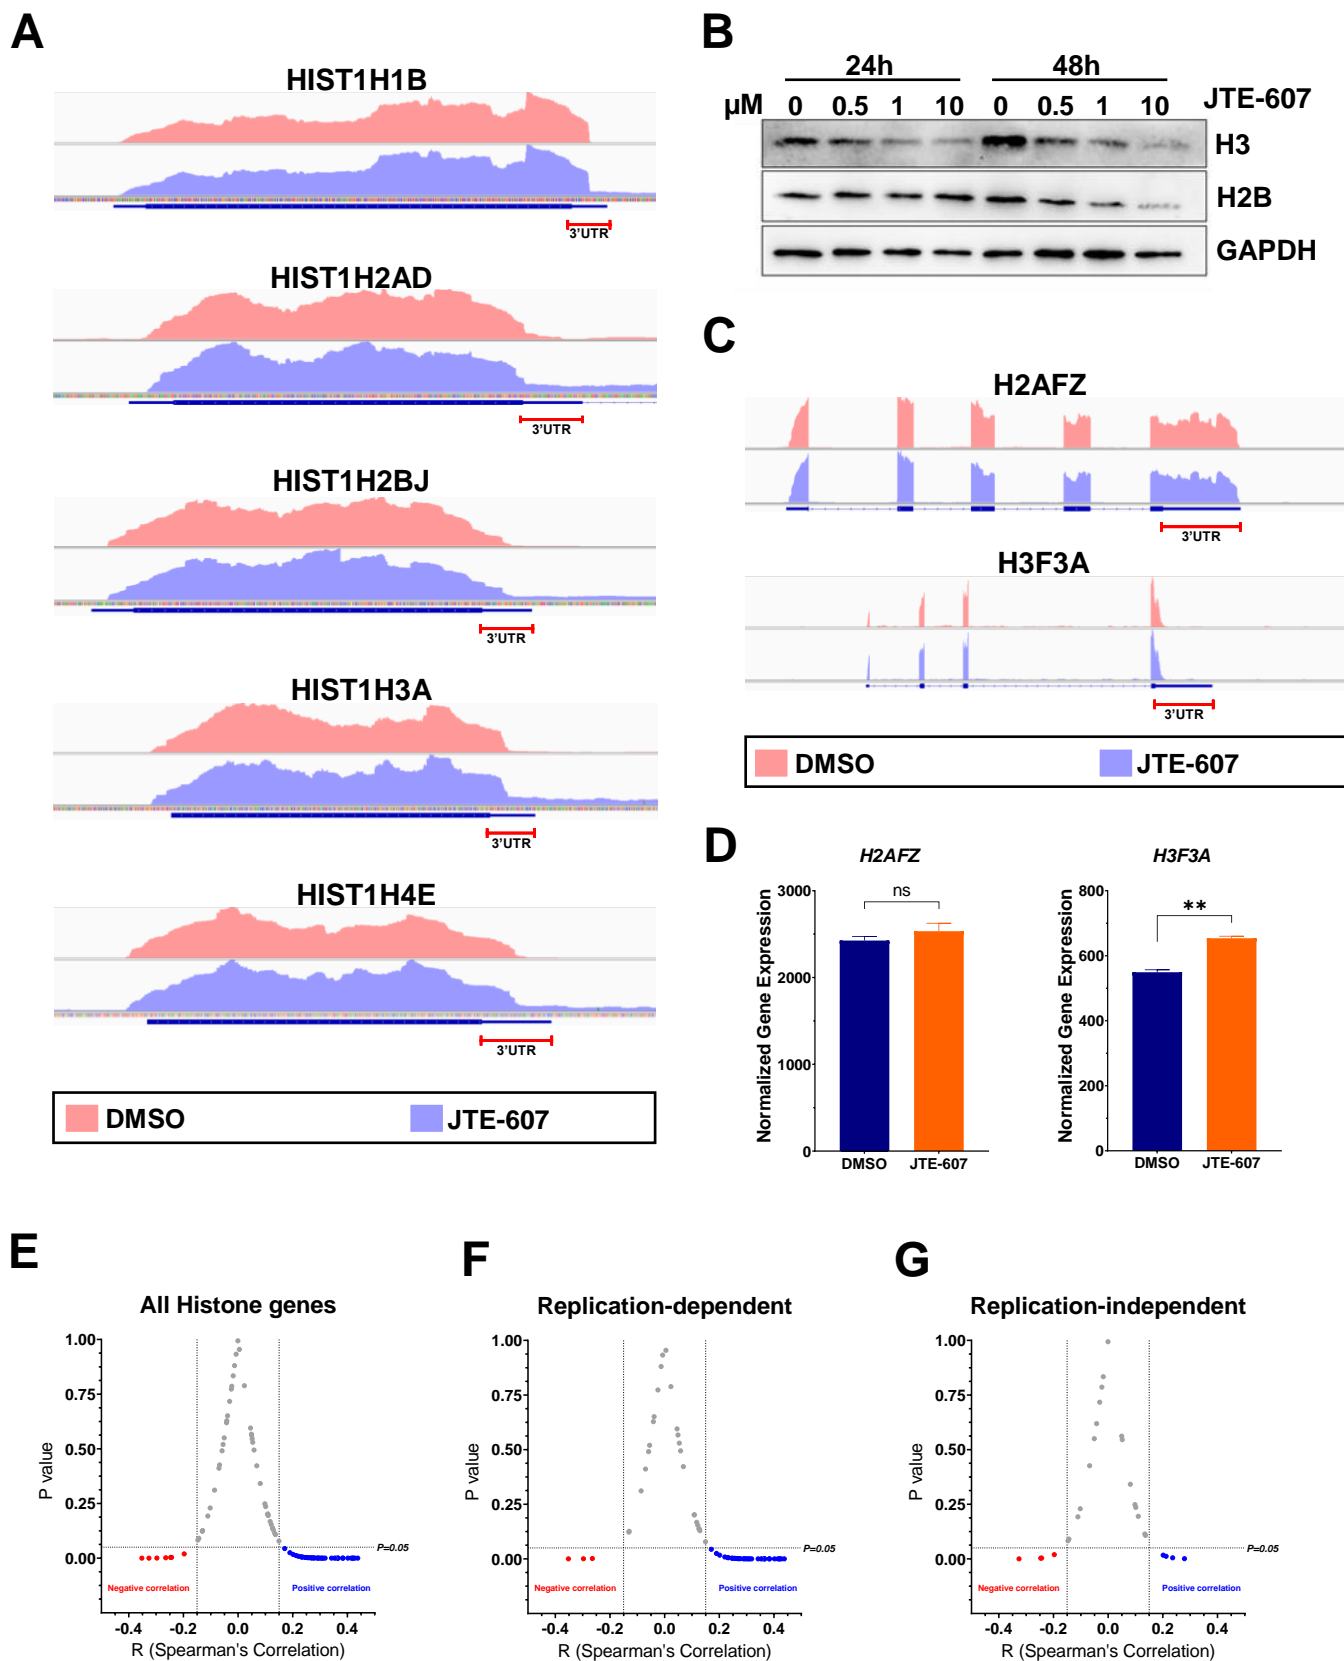

# Figure 7

## A

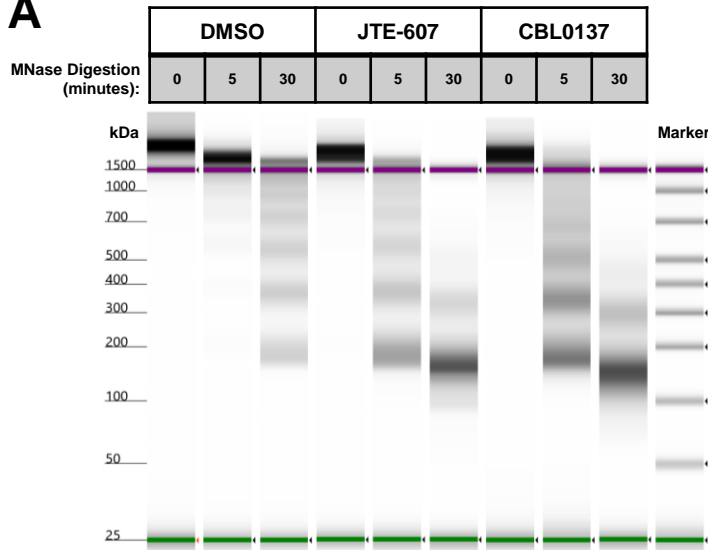

## B

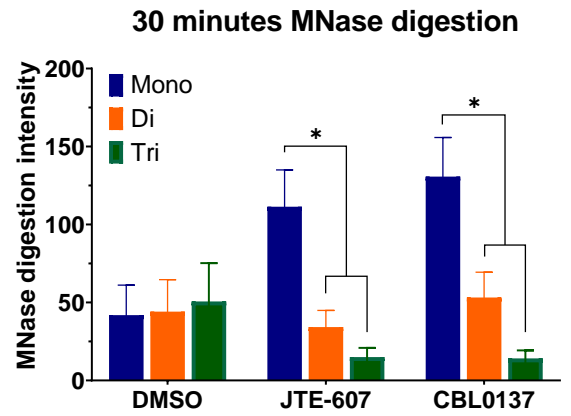

## C

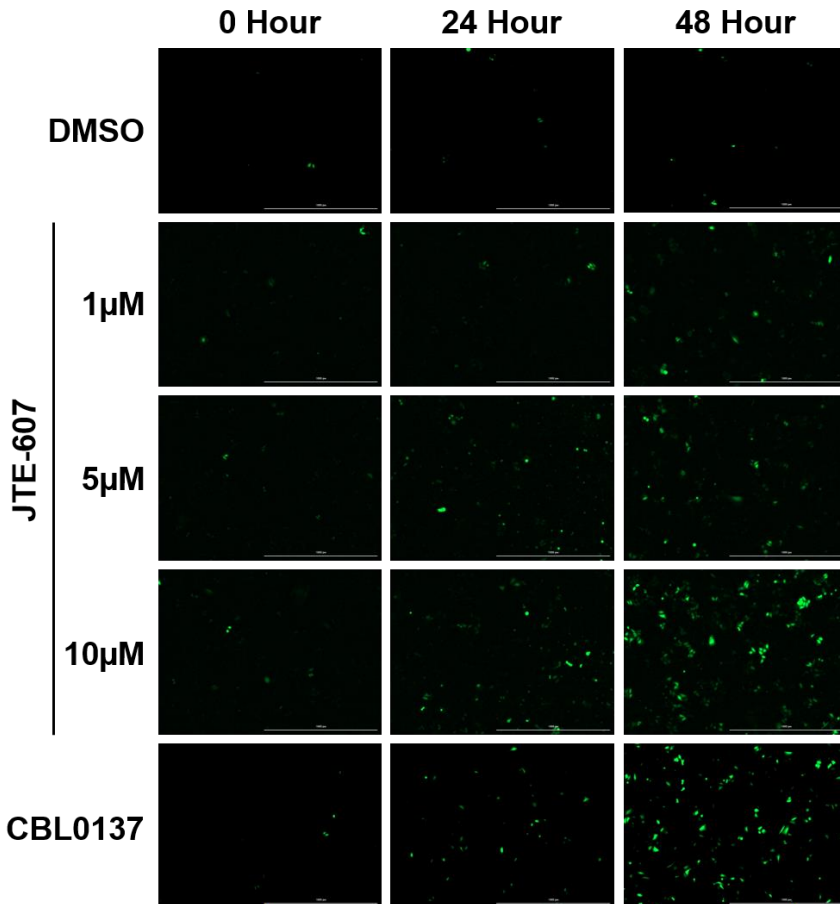

## D

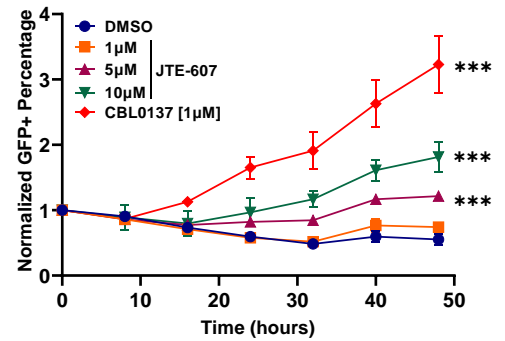

## E

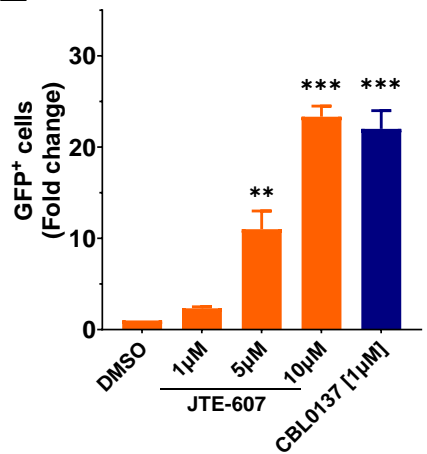



# Figure 8

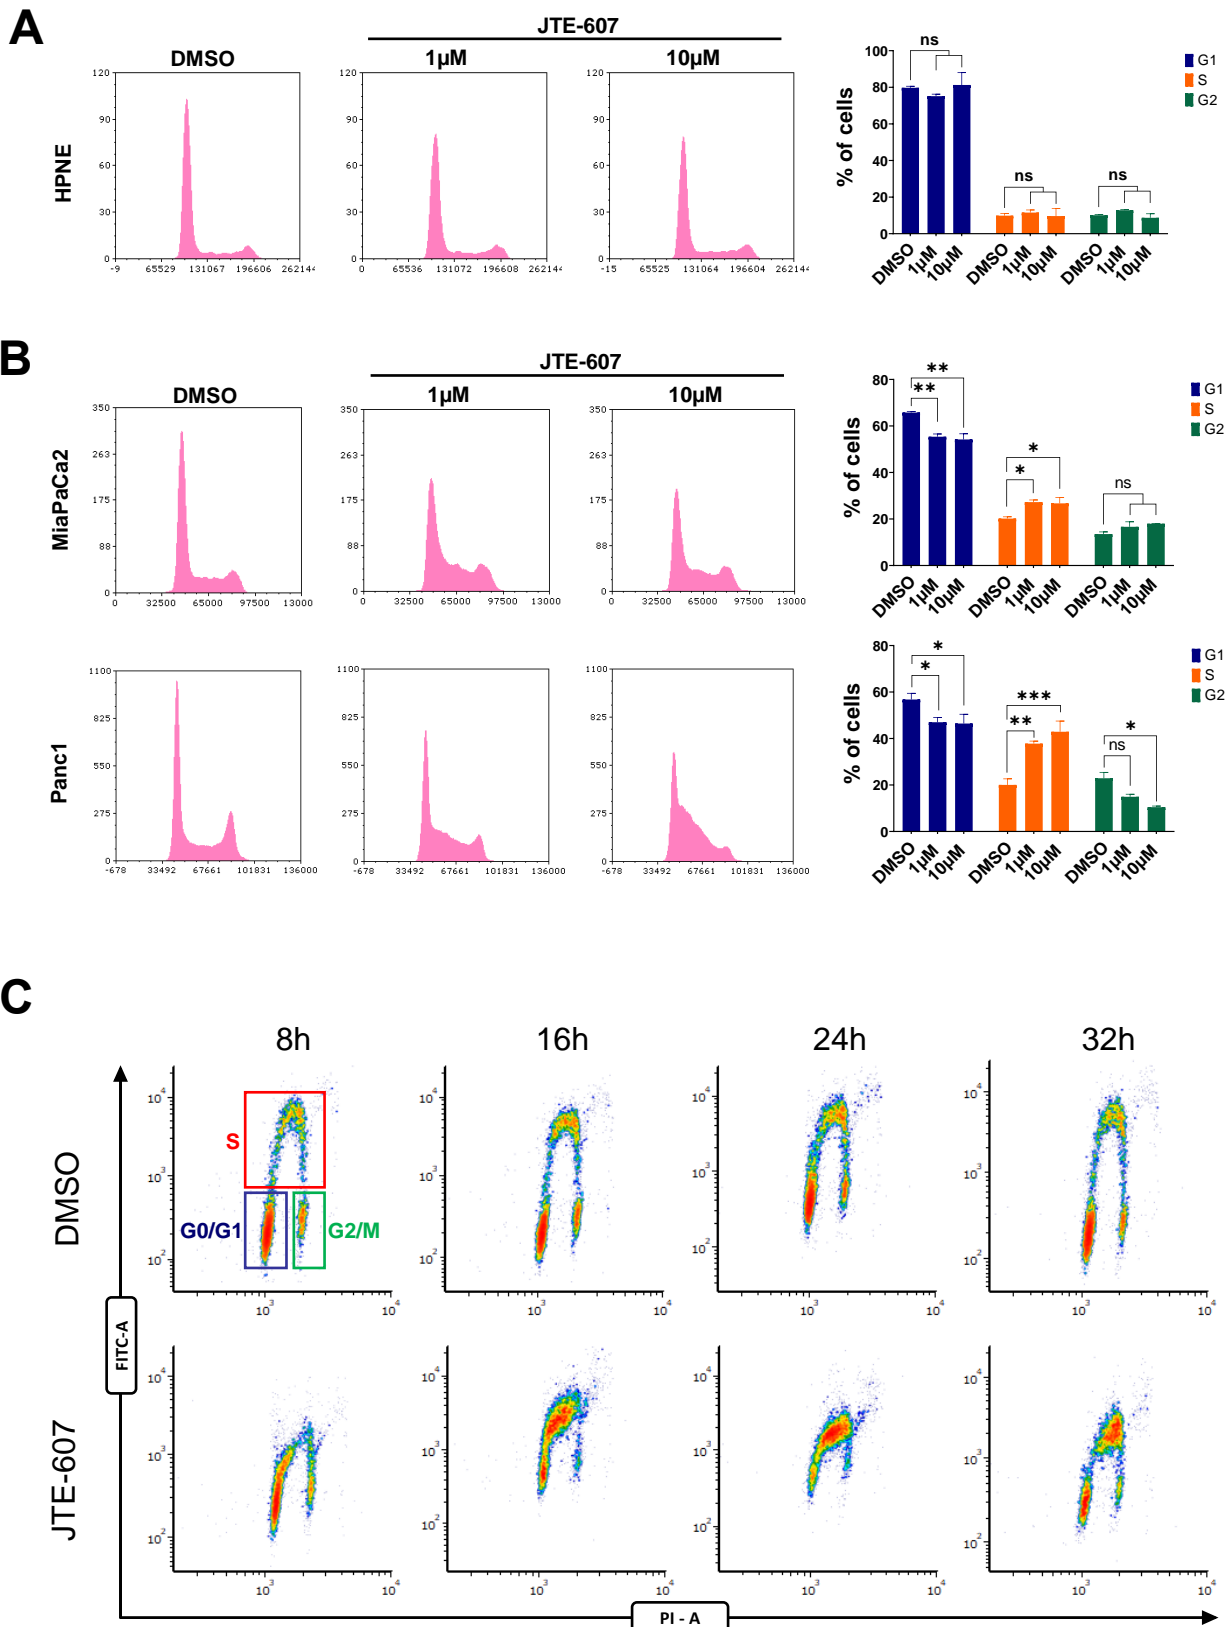

Source: https://www.biorxiv.org/content/10.1101/2022.05.09.491230.full.pdf
